# Supplementary material
Source: publisher site journal article supplement (https://www.dovepress.com/article/489433)
Supplement: Supplementary file 1 [file get_supplementary_file.php]

Supplementary Online Content

eFigure 1. Receiver operating characteristic (ROC) curve analysis for predicting OSA.

eFigure 2. Leave-one-out plot and Funnel plot of MR analyses from WC to OSA.

eTable 1. Details of the GWASs included in the Mendelian randomization.

eTable 2. Comparative analysis of three obesity indicators.

eTable 3. Detailed information on the Instrumental variable.

**eTable 4.** Casual effects of MR Analysis between WC and OSA.

eTable 5. Results of sensitivity analysis.

eTable 6. Results of MRlap analysis.

**eTable 7.** Multivariate MR results.

This supplementary material has been provided by the authors to give readers additional information about their work.


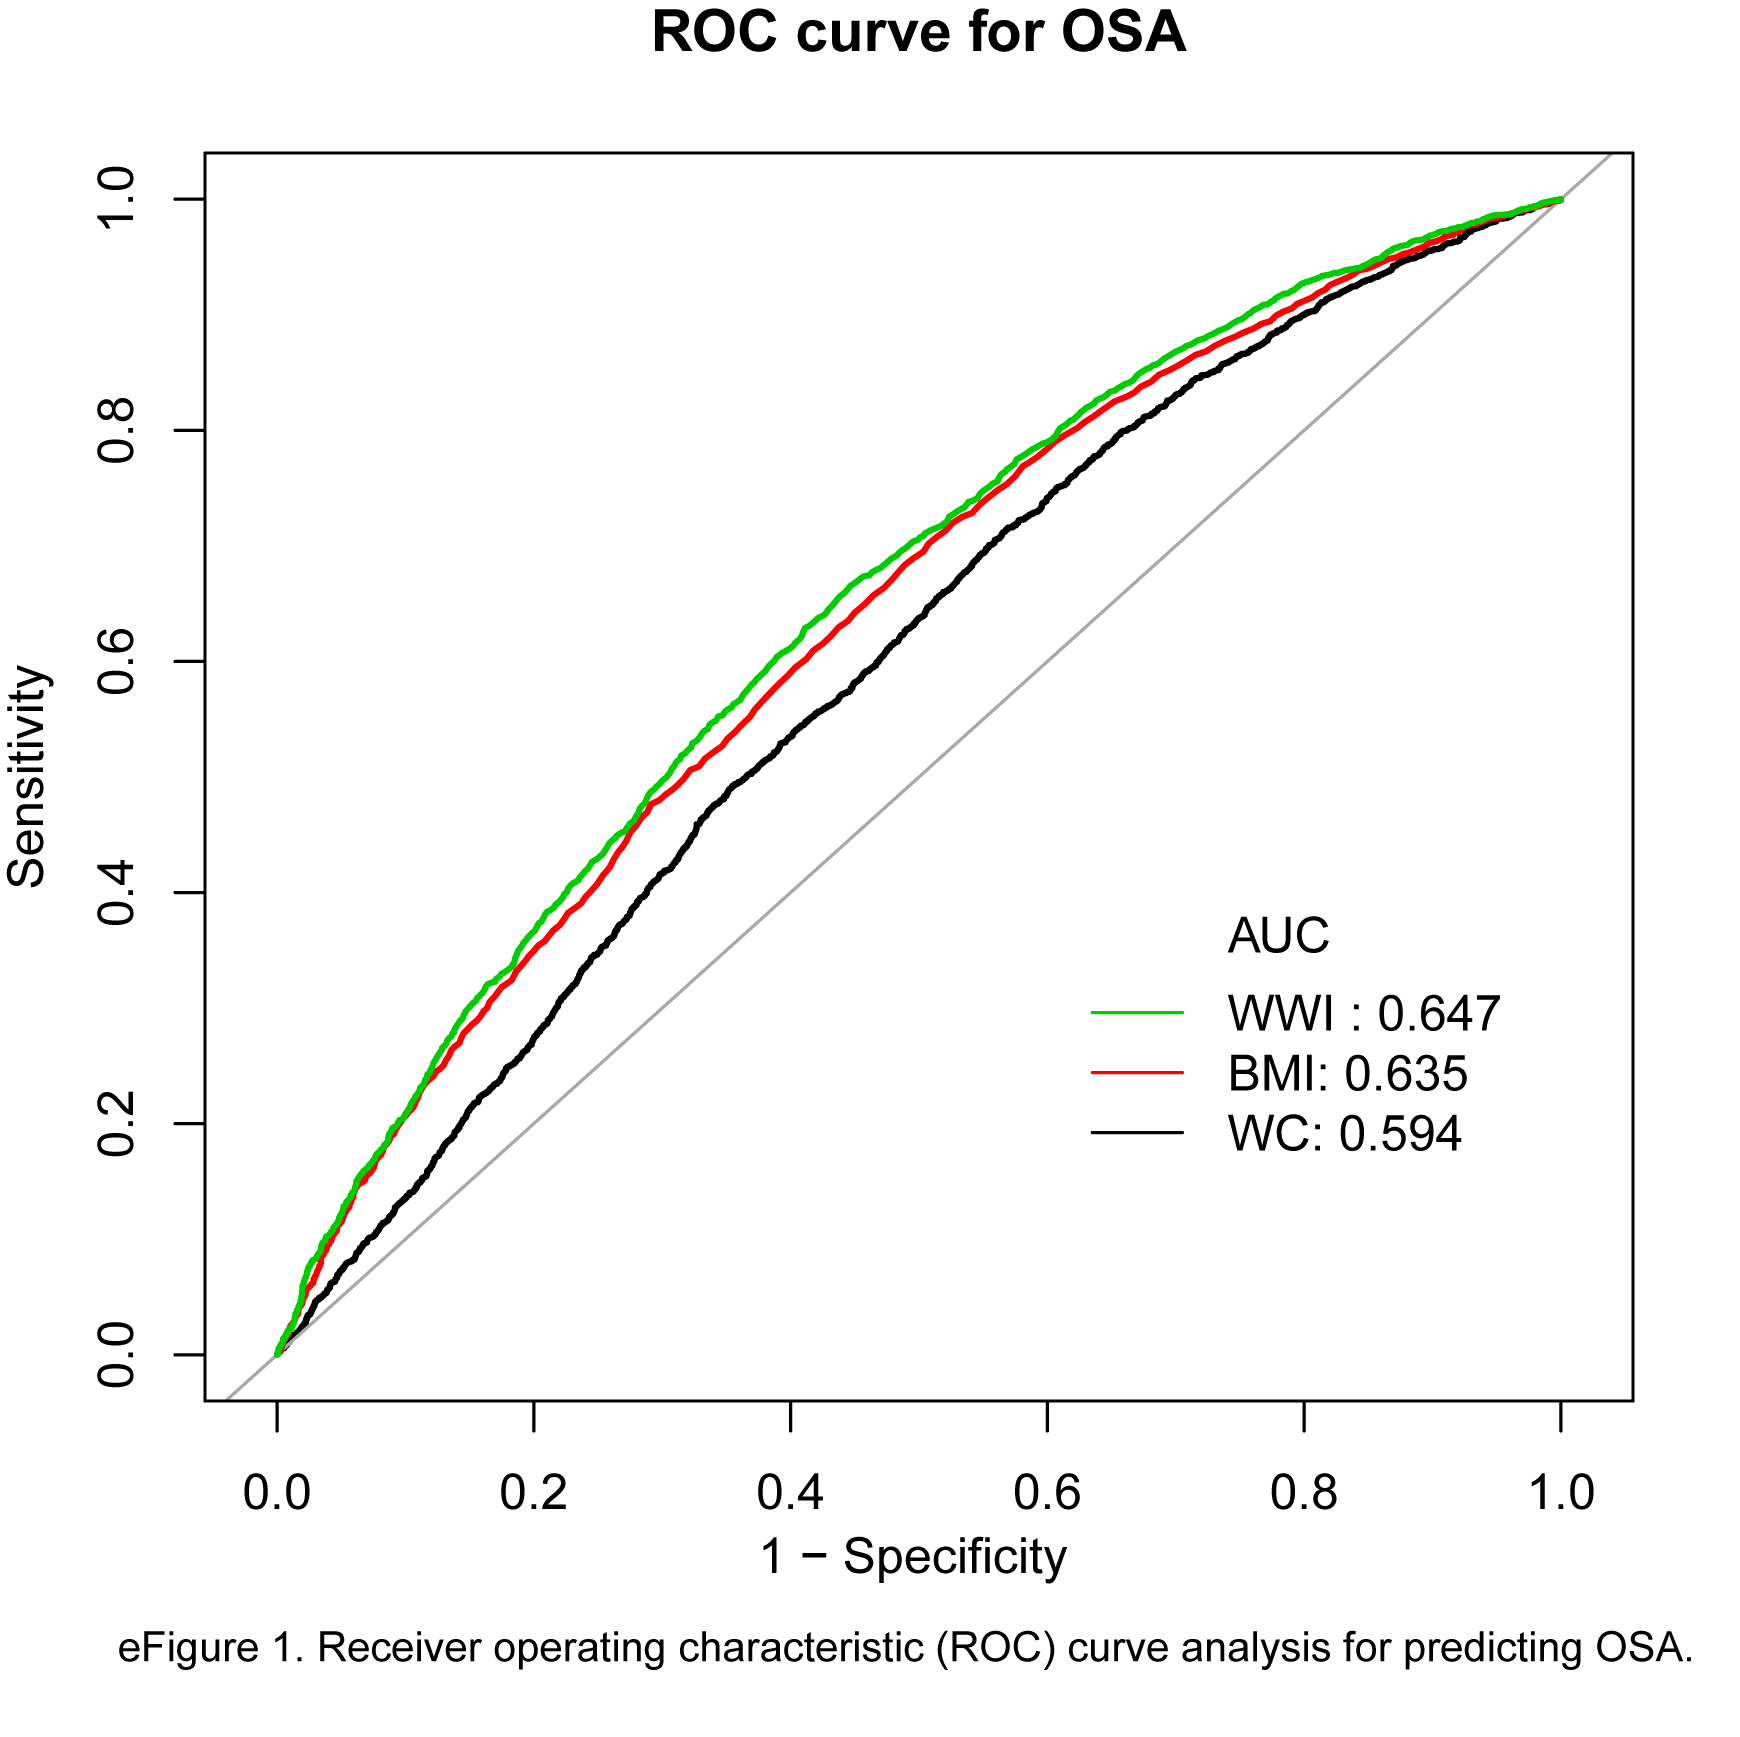


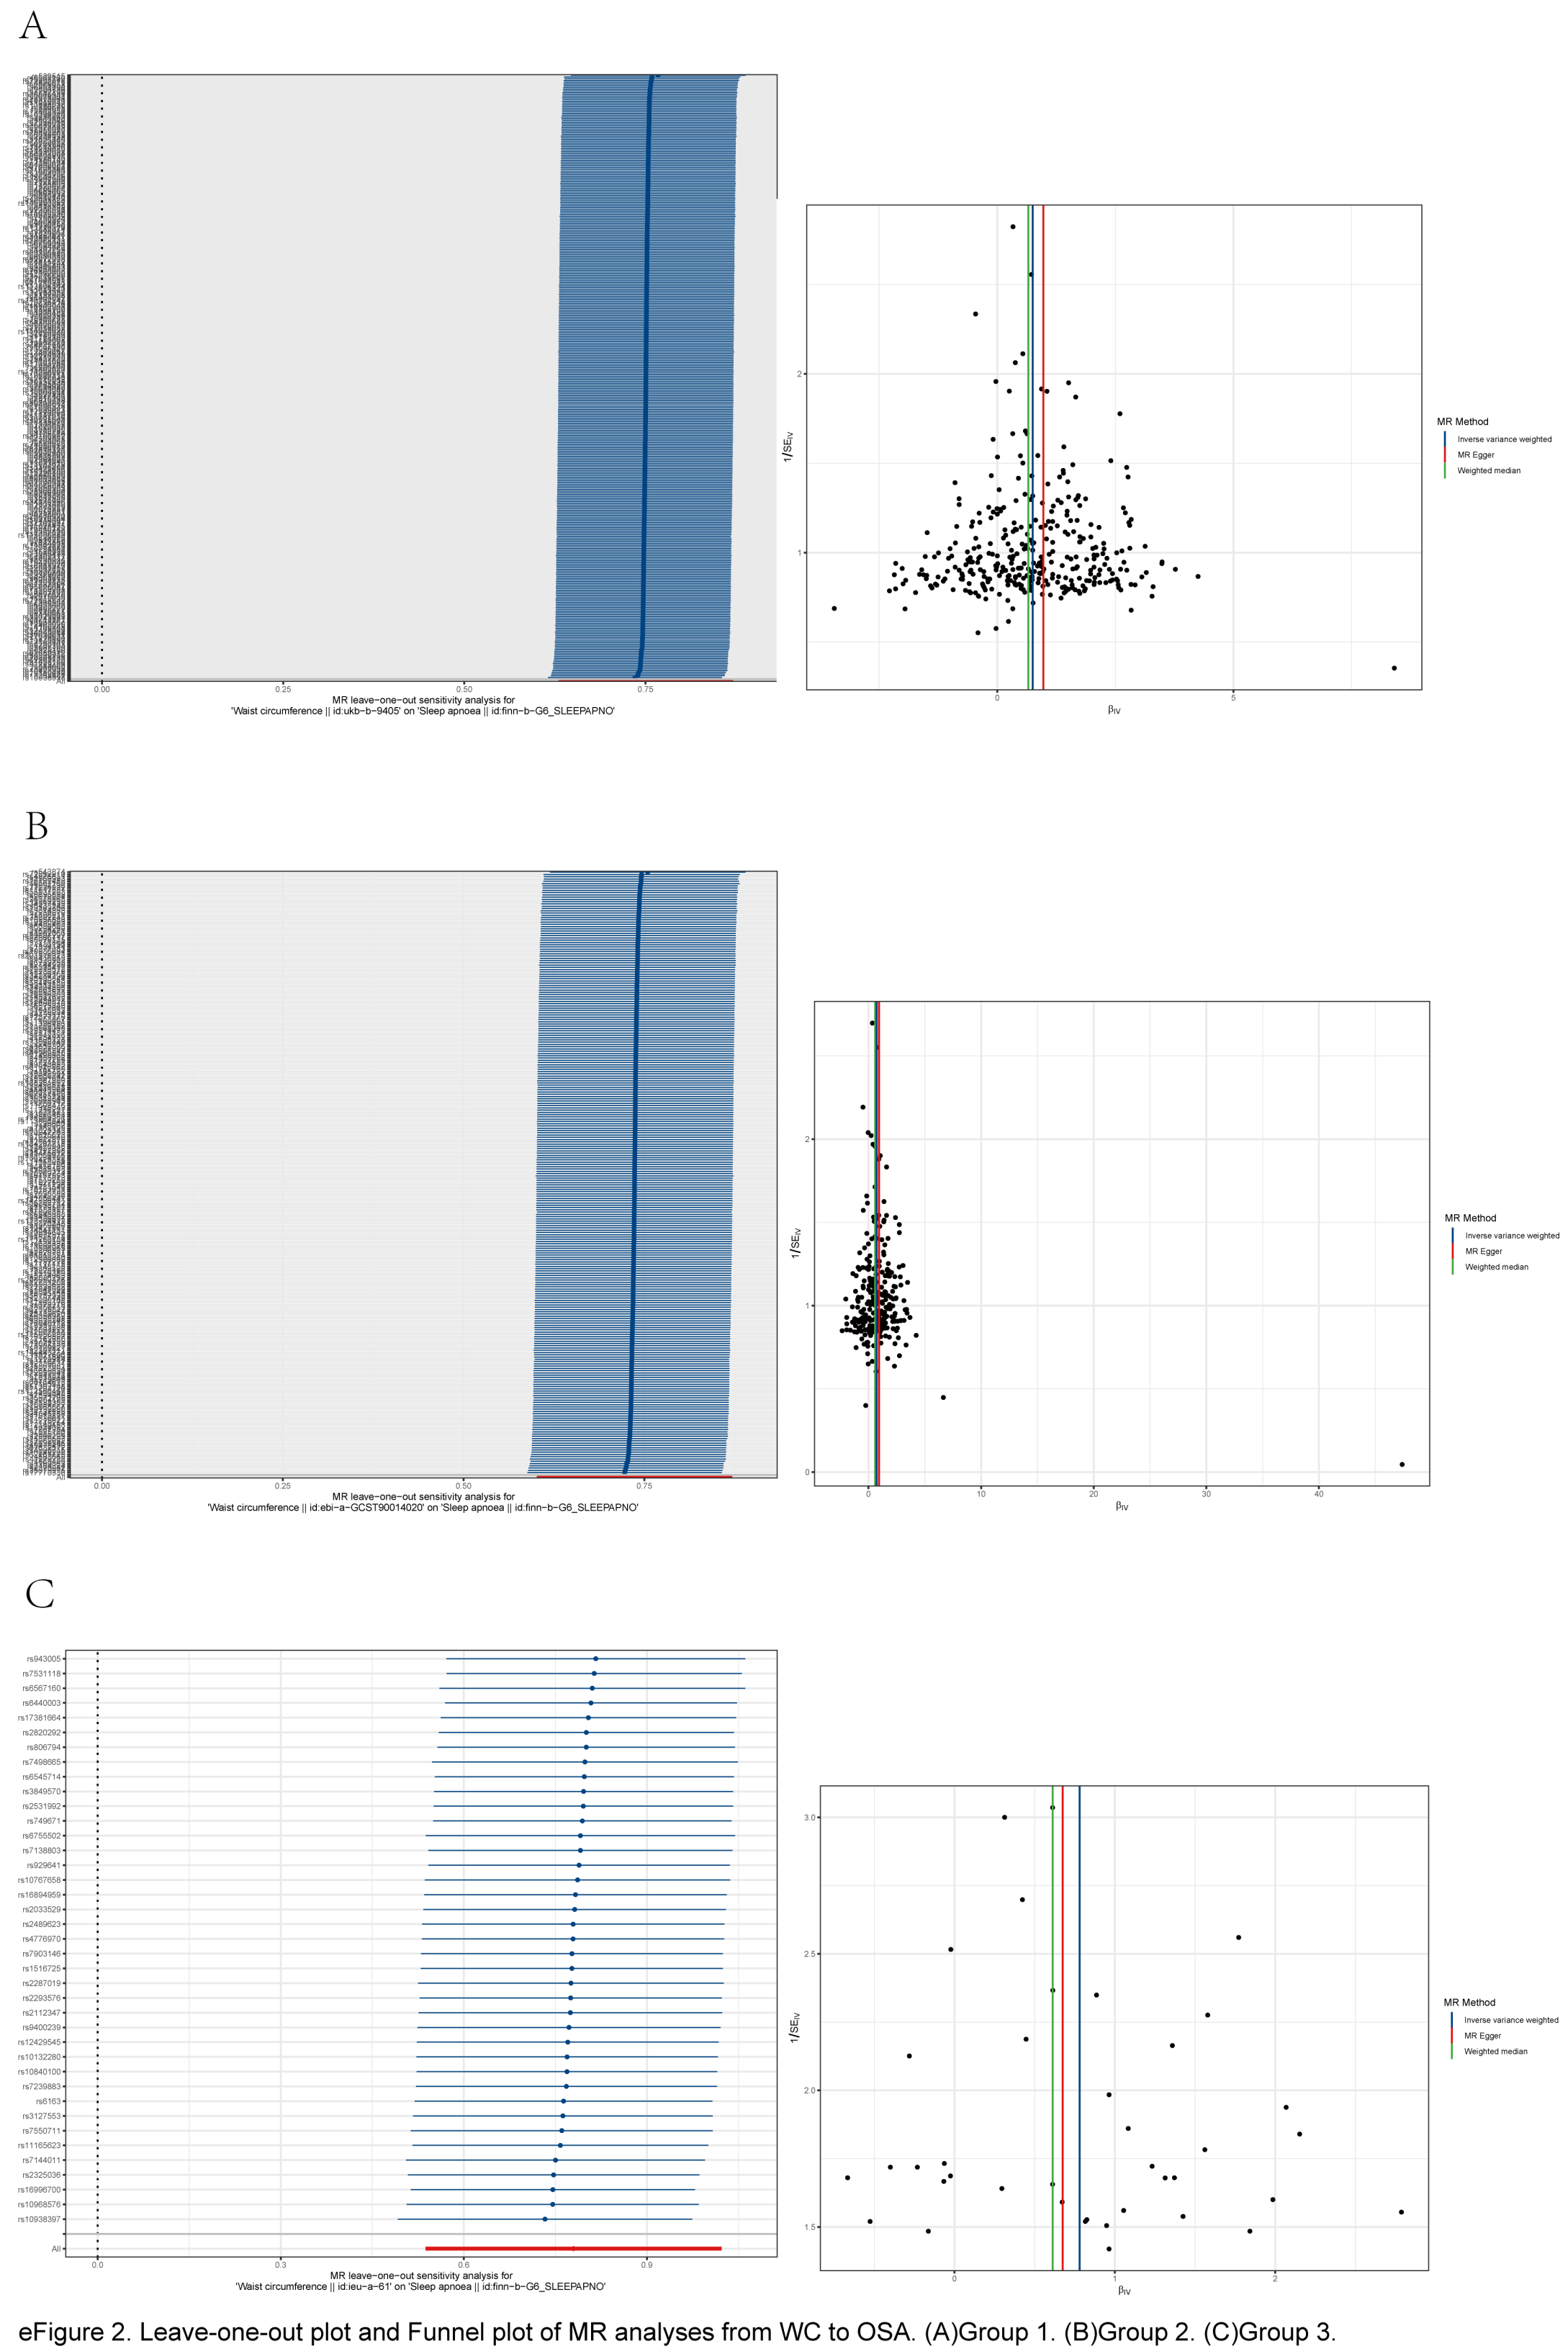


eTable 1. Details of the GWASs included in the Mendelian randomization.

| **Group** | **Trait** | **Sample size** | **Population** | **GWAS-ID** | **Year** |
| --- | --- | --- | --- | --- | --- |
| 1 | WC | 462,166 | European | ukb-b-9405 | 2018 |
| 2 | WC | 407,661 | European | ebi-a-GCST90014020 | 2021 |
| 3 | WC | 232,101 | European | ieu-a-61 | 2015 |
| NA | OSA | 16,761 cases and 201,194 controls | European | finn-b-G6_SLEEPAPNO | 2021 |
| NA | Smoking | 337,334 cases and 11,913,712 controls | European | ieu-b-25 | 2019 |
| NA | Alcohol drinking | 335,394 cases and 11,887,895 controls | European | ieu-b-73 | 2019 |

eTable 2. Receiver operating characteristic (ROC) curve analysis for predicting OSA.

| **Test** | **AUC** | **95%CI low** | **95%CI upp** | **Cutoff value** | **Specificity** | **Sensitivity** |
| --- | --- | --- | --- | --- | --- | --- |
| WWI | 0.647 | 0.635 | 0.659 | 10.818 | 0.554 | 0.665 |
| BMI | 0.635 | 0.623 | 0.647 | 27.450 | 0.511 | 0.683 |
| WC | 0.594 | 0.582 | 0.607 | 97.250 | 0.431 | 0.716 |

eTable 3. Detailed information on the Instrumental variable.

| Group 1 | | | | | | | | | |
| --- | --- | --- | --- | --- | --- | --- | --- | --- | --- |
| ID | SNP | Effect_allele | Other_allele | Se | Beta | Chr | *P*_val | F | Total F |
| ukb-b-9405 | rs1013402 | G | A | 0.00191723 | 0.0250906 | 11 | 3.90E-39 | 171.267 | 55.12568249 |
| ukb-b-9405 | rs10150482 | A | G | 0.00216957 | 0.0219574 | 14 | 4.50E-24 | 102.427 |  |
| ukb-b-9405 | rs10184230 | T | C | 0.00186862 | -0.0121164 | 2 | 8.90E-11 | 42.044 |  |
| ukb-b-9405 | rs1019240 | T | A | 0.00187454 | 0.0124023 | 9 | 3.70E-11 | 43.774 |  |
| ukb-b-9405 | rs10236214 | T | C | 0.00187561 | 0.013799 | 7 | 1.90E-13 | 54.127 |  |
| ukb-b-9405 | rs10248298 | A | C | 0.00185427 | 0.0132553 | 7 | 8.80E-13 | 51.101 |  |
| ukb-b-9405 | rs1025065 | G | T | 0.00186623 | -0.010284 | 16 | 3.60E-08 | 30.366 |  |
| ukb-b-9405 | rs10257197 | G | A | 0.00245771 | -0.0154813 | 7 | 3.00E-10 | 39.678 |  |
| ukb-b-9405 | rs10269774 | A | G | 0.00190774 | 0.0119597 | 7 | 3.60E-10 | 39.301 |  |
| ukb-b-9405 | rs1037702 | A | G | 0.00184913 | -0.0101871 | 4 | 3.60E-08 | 30.351 |  |
| ukb-b-9405 | rs10423928 | A | T | 0.00225944 | -0.0265551 | 19 | 6.80E-32 | 138.132 |  |
| ukb-b-9405 | rs10471636 | A | G | 0.00182385 | -0.010111 | 5 | 3.00E-08 | 30.733 |  |
| ukb-b-9405 | rs10490869 | T | A | 0.00220375 | 0.0163389 | 3 | 1.20E-13 | 54.969 |  |
| ukb-b-9405 | rs10499014 | G | C | 0.00202893 | -0.0132827 | 6 | 5.90E-11 | 42.859 |  |
| ukb-b-9405 | rs10505836 | C | A | 0.00259774 | 0.0152705 | 12 | 4.10E-09 | 34.555 |  |
| ukb-b-9405 | rs1056441 | C | T | 0.00191349 | 0.0127063 | 20 | 3.10E-11 | 44.095 |  |
| ukb-b-9405 | rs10732335 | C | A | 0.00180443 | -0.0147414 | 9 | 3.10E-16 | 66.742 |  |
| ukb-b-9405 | rs10757898 | A | G | 0.00181479 | -0.00996701 | 9 | 4.00E-08 | 30.163 |  |
| ukb-b-9405 | rs1078455 | C | T | 0.00194801 | 0.0111735 | 3 | 9.70E-09 | 32.900 |  |
| ukb-b-9405 | rs10787738 | T | C | 0.00208556 | 0.0153066 | 10 | 2.10E-13 | 53.866 |  |
| ukb-b-9405 | rs10795418 | G | A | 0.00190172 | 0.0127004 | 10 | 2.40E-11 | 44.601 |  |
| ukb-b-9405 | rs10803762 | A | G | 0.00191493 | 0.0119451 | 2 | 4.40E-10 | 38.911 |  |
| ukb-b-9405 | rs10824211 | T | C | 0.00259306 | 0.0150646 | 10 | 6.30E-09 | 33.751 |  |
| ukb-b-9405 | rs10827380 | T | C | 0.0019302 | 0.0116104 | 10 | 1.80E-09 | 36.182 |  |
| ukb-b-9405 | rs10835676 | G | C | 0.00209843 | 0.0123512 | 11 | 4.00E-09 | 34.644 |  |
| ukb-b-9405 | rs10938398 | A | G | 0.00180756 | 0.0222115 | 4 | 1.00E-34 | 150.998 |  |
| ukb-b-9405 | rs10947793 | G | A | 0.0018605 | -0.0127212 | 6 | 8.10E-12 | 46.752 |  |
| ukb-b-9405 | rs10957087 | A | T | 0.00244363 | 0.0139437 | 8 | 1.20E-08 | 32.560 |  |
| ukb-b-9405 | rs10992854 | C | T | 0.00192897 | -0.0112545 | 9 | 5.40E-09 | 34.041 |  |
| ukb-b-9405 | rs11012732 | G | A | 0.00190117 | 0.0193536 | 10 | 2.40E-24 | 103.629 |  |
| ukb-b-9405 | rs11058233 | G | A | 0.00206852 | 0.0159705 | 12 | 1.20E-14 | 59.610 |  |
| ukb-b-9405 | rs1108548 | G | A | 0.00200003 | 0.0121715 | 1 | 1.20E-09 | 37.035 |  |
| ukb-b-9405 | rs11099020 | T | C | 0.00186604 | -0.0112449 | 4 | 1.70E-09 | 36.314 |  |
| ukb-b-9405 | rs1111817 | G | C | 0.00188105 | -0.0105597 | 9 | 2.00E-08 | 31.514 |  |
| ukb-b-9405 | rs111258054 | T | C | 0.00234105 | 0.0159528 | 11 | 9.50E-12 | 46.436 |  |
| ukb-b-9405 | rs11150745 | G | A | 0.00192604 | -0.0160848 | 17 | 6.80E-17 | 69.743 |  |
| ukb-b-9405 | rs11160600 | G | A | 0.00311766 | 0.0180478 | 14 | 7.10E-09 | 33.511 |  |
| ukb-b-9405 | rs11162968 | C | T | 0.00192412 | 0.0122283 | 1 | 2.10E-10 | 40.389 |  |
| ukb-b-9405 | rs11165493 | A | G | 0.00189335 | 0.0107576 | 1 | 1.30E-08 | 32.283 |  |
| ukb-b-9405 | rs1117619 | G | C | 0.00206049 | -0.0120513 | 3 | 5.00E-09 | 34.208 |  |
| ukb-b-9405 | rs11196657 | C | T | 0.00210599 | 0.0124451 | 10 | 3.40E-09 | 34.921 |  |
| ukb-b-9405 | rs11215381 | C | T | 0.00179363 | 0.0111759 | 11 | 4.60E-10 | 38.824 |  |
| ukb-b-9405 | rs11218510 | A | G | 0.00182872 | -0.0115323 | 11 | 2.90E-10 | 39.768 |  |
| ukb-b-9405 | rs11223204 | G | A | 0.00180899 | 0.0122154 | 11 | 1.50E-11 | 45.598 |  |
| ukb-b-9405 | rs113132247 | A | G | 0.00249349 | 0.0153033 | 9 | 8.40E-10 | 37.666 |  |
| ukb-b-9405 | rs113866544 | C | T | 0.003552 | 0.0303242 | 17 | 1.40E-17 | 72.884 |  |
| ukb-b-9405 | rs114964326 | A | G | 0.00537007 | -0.0301131 | 2 | 2.10E-08 | 31.445 |  |
| ukb-b-9405 | rs115056380 | A | G | 0.00416636 | -0.0236683 | 1 | 1.30E-08 | 32.272 |  |
| ukb-b-9405 | rs11603984 | T | G | 0.00261937 | -0.0169839 | 11 | 8.90E-11 | 42.042 |  |
| ukb-b-9405 | rs11614326 | A | G | 0.0018167 | -0.0102606 | 12 | 1.60E-08 | 31.899 |  |
| ukb-b-9405 | rs11636611 | T | C | 0.00179296 | 0.0107144 | 15 | 2.30E-09 | 35.710 |  |
| ukb-b-9405 | rs11639596 | C | A | 0.00207809 | -0.011872 | 16 | 1.10E-08 | 32.638 |  |
| ukb-b-9405 | rs11653367 | G | A | 0.00191685 | -0.0151666 | 17 | 2.50E-15 | 62.604 |  |
| ukb-b-9405 | rs11675464 | G | A | 0.00179869 | 0.0112729 | 2 | 3.70E-10 | 39.279 |  |
| ukb-b-9405 | rs11704728 | T | C | 0.00226433 | 0.0133307 | 22 | 3.90E-09 | 34.660 |  |
| ukb-b-9405 | rs11757278 | C | T | 0.00194427 | -0.012784 | 6 | 4.90E-11 | 43.233 |  |
| ukb-b-9405 | rs11767811 | A | G | 0.00231875 | -0.0150345 | 7 | 8.90E-11 | 42.041 |  |
| ukb-b-9405 | rs11773362 | T | C | 0.0018937 | -0.0104772 | 7 | 3.20E-08 | 30.610 |  |
| ukb-b-9405 | rs11787216 | T | C | 0.0018915 | 0.011505 | 8 | 1.20E-09 | 36.996 |  |
| ukb-b-9405 | rs1182199 | A | C | 0.00194469 | -0.0135196 | 7 | 3.60E-12 | 48.331 |  |
| ukb-b-9405 | rs11824092 | C | T | 0.00187069 | 0.012491 | 11 | 2.40E-11 | 44.585 |  |
| ukb-b-9405 | rs1183668 | G | C | 0.00186172 | -0.0120589 | 13 | 9.30E-11 | 41.955 |  |
| ukb-b-9405 | rs11842871 | T | G | 0.00204439 | -0.0127878 | 13 | 4.00E-10 | 39.126 |  |
| ukb-b-9405 | rs1188209 | G | A | 0.00181136 | 0.0102398 | 14 | 1.60E-08 | 31.958 |  |
| ukb-b-9405 | rs11898037 | C | T | 0.00185324 | 0.0105694 | 2 | 1.20E-08 | 32.527 |  |
| ukb-b-9405 | rs1191600 | A | C | 0.00183345 | -0.0108005 | 14 | 3.80E-09 | 34.702 |  |
| ukb-b-9405 | rs12001437 | C | T | 0.00185543 | 0.0109331 | 9 | 3.80E-09 | 34.721 |  |
| ukb-b-9405 | rs12042959 | G | A | 0.00255686 | -0.014934 | 1 | 5.20E-09 | 34.114 |  |
| ukb-b-9405 | rs12072739 | G | A | 0.00214325 | 0.0162106 | 1 | 3.90E-14 | 57.207 |  |
| ukb-b-9405 | rs12107172 | G | A | 0.00260901 | 0.0156855 | 3 | 1.80E-09 | 36.145 |  |
| ukb-b-9405 | rs12140153 | T | G | 0.00313243 | -0.0265936 | 1 | 2.10E-17 | 72.076 |  |
| ukb-b-9405 | rs1218824 | A | G | 0.00189332 | 0.012491 | 13 | 4.20E-11 | 43.526 |  |
| ukb-b-9405 | rs12225345 | G | A | 0.00240459 | 0.0145982 | 11 | 1.30E-09 | 36.857 |  |
| ukb-b-9405 | rs12245654 | C | A | 0.00347158 | 0.023047 | 10 | 3.20E-11 | 44.073 |  |
| ukb-b-9405 | rs12273545 | T | C | 0.00387781 | 0.0222638 | 11 | 9.40E-09 | 32.963 |  |
| ukb-b-9405 | rs12287076 | C | G | 0.00197238 | 0.0210638 | 11 | 1.30E-26 | 114.049 |  |
| ukb-b-9405 | rs1229984 | C | T | 0.00542443 | 0.0301377 | 4 | 2.80E-08 | 30.868 |  |
| ukb-b-9405 | rs12375196 | A | C | 0.00182044 | 0.0132187 | 7 | 3.80E-13 | 52.726 |  |
| ukb-b-9405 | rs12462975 | A | G | 0.00191777 | 0.01754 | 19 | 5.90E-20 | 83.650 |  |
| ukb-b-9405 | rs12463617 | C | A | 0.00236577 | 0.0431919 | 2 | 1.80E-74 | 333.319 |  |
| ukb-b-9405 | rs12478299 | C | T | 0.00206169 | -0.0115796 | 2 | 1.90E-08 | 31.546 |  |
| ukb-b-9405 | rs12549000 | A | T | 0.00292178 | 0.0164111 | 8 | 1.90E-08 | 31.549 |  |
| ukb-b-9405 | rs12877270 | A | G | 0.00181553 | 0.0117224 | 13 | 1.10E-10 | 41.689 |  |
| ukb-b-9405 | rs12880641 | G | T | 0.00188965 | -0.0138449 | 14 | 2.40E-13 | 53.681 |  |
| ukb-b-9405 | rs12926311 | C | G | 0.00187714 | -0.0124576 | 16 | 3.20E-11 | 44.043 |  |
| ukb-b-9405 | rs1296328 | C | A | 0.00180908 | -0.0131912 | 4 | 3.10E-13 | 53.168 |  |
| ukb-b-9405 | rs12983532 | T | C | 0.00209191 | -0.0149964 | 19 | 7.60E-13 | 51.391 |  |
| ukb-b-9405 | rs13033310 | A | G | 0.00206781 | 0.0125512 | 2 | 1.30E-09 | 36.843 |  |
| ukb-b-9405 | rs13163306 | A | G | 0.00179351 | -0.00988959 | 5 | 3.50E-08 | 30.405 |  |
| ukb-b-9405 | rs13182474 | C | G | 0.00192056 | -0.0117225 | 5 | 1.00E-09 | 37.255 |  |
| ukb-b-9405 | rs1320903 | A | G | 0.00191652 | 0.017072 | 3 | 5.20E-19 | 79.349 |  |
| ukb-b-9405 | rs1321521 | A | C | 0.00187867 | 0.0141428 | 6 | 5.10E-14 | 56.672 |  |
| ukb-b-9405 | rs1327259 | G | A | 0.0018403 | -0.0115864 | 6 | 3.10E-10 | 39.639 |  |
| ukb-b-9405 | rs13288841 | A | G | 0.00191229 | 0.0190501 | 9 | 2.20E-23 | 99.240 |  |
| ukb-b-9405 | rs13333747 | C | T | 0.00232636 | -0.022678 | 16 | 1.90E-22 | 95.029 |  |
| ukb-b-9405 | rs1336486 | G | T | 0.00190819 | 0.012489 | 13 | 6.00E-11 | 42.836 |  |
| ukb-b-9405 | rs13410783 | G | A | 0.0018498 | 0.0141058 | 2 | 2.40E-14 | 58.149 |  |
| ukb-b-9405 | rs13420048 | A | C | 0.00185957 | -0.0133504 | 2 | 7.00E-13 | 51.542 |  |
| ukb-b-9405 | rs13427822 | G | A | 0.00203048 | -0.0141495 | 2 | 3.20E-12 | 48.561 |  |
| ukb-b-9405 | rs1346841 | A | G | 0.00182614 | -0.0106038 | 4 | 6.40E-09 | 33.717 |  |
| ukb-b-9405 | rs1357079 | C | T | 0.00180784 | 0.011183 | 3 | 6.20E-10 | 38.265 |  |
| ukb-b-9405 | rs1360201 | T | C | 0.00178924 | 0.00979421 | 9 | 4.40E-08 | 29.964 |  |
| ukb-b-9405 | rs1411432 | C | A | 0.00230632 | 0.0150036 | 9 | 7.70E-11 | 42.321 |  |
| ukb-b-9405 | rs1436348 | G | A | 0.00181185 | 0.0124929 | 3 | 5.40E-12 | 47.543 |  |
| ukb-b-9405 | rs1441264 | A | G | 0.00186203 | 0.0150095 | 13 | 7.60E-16 | 64.977 |  |
| ukb-b-9405 | rs145350287 | A | T | 0.00458244 | -0.0322326 | 12 | 2.00E-12 | 49.476 |  |
| ukb-b-9405 | rs1458156 | T | C | 0.00179105 | 0.0146036 | 12 | 3.50E-16 | 66.482 |  |
| ukb-b-9405 | rs1502317 | T | C | 0.0020032 | -0.0173687 | 11 | 4.30E-18 | 75.177 |  |
| ukb-b-9405 | rs1559900 | T | C | 0.00197882 | 0.0127734 | 8 | 1.10E-10 | 41.668 |  |
| ukb-b-9405 | rs1570298 | T | A | 0.00204452 | 0.0120451 | 6 | 3.80E-09 | 34.709 |  |
| ukb-b-9405 | rs1582931 | A | G | 0.00180588 | -0.0138548 | 5 | 1.70E-14 | 58.860 |  |
| ukb-b-9405 | rs1609010 | G | A | 0.00180594 | 0.0149337 | 8 | 1.30E-16 | 68.380 |  |
| ukb-b-9405 | rs1609303 | A | T | 0.00185779 | 0.0152662 | 2 | 2.10E-16 | 67.526 |  |
| ukb-b-9405 | rs1619442 | C | T | 0.00257242 | -0.0162997 | 9 | 2.40E-10 | 40.149 |  |
| ukb-b-9405 | rs1625623 | T | C | 0.00187307 | 0.0107407 | 5 | 9.80E-09 | 32.882 |  |
| ukb-b-9405 | rs1657930 | A | G | 0.00224816 | -0.0142481 | 15 | 2.30E-10 | 40.166 |  |
| ukb-b-9405 | rs1711171 | C | T | 0.00206542 | 0.0175635 | 3 | 1.80E-17 | 72.311 |  |
| ukb-b-9405 | rs17296856 | C | A | 0.00199629 | -0.0156228 | 15 | 5.00E-15 | 61.245 |  |
| ukb-b-9405 | rs1731246 | T | G | 0.0020818 | -0.0118366 | 2 | 1.30E-08 | 32.328 |  |
| ukb-b-9405 | rs17446091 | C | T | 0.00222979 | 0.0149141 | 8 | 2.30E-11 | 44.737 |  |
| ukb-b-9405 | rs1752169 | A | C | 0.00206705 | 0.0143082 | 9 | 4.50E-12 | 47.915 |  |
| ukb-b-9405 | rs17681738 | T | C | 0.00190864 | 0.0105421 | 17 | 3.30E-08 | 30.507 |  |
| ukb-b-9405 | rs1788808 | G | A | 0.00179299 | -0.0208198 | 18 | 3.60E-31 | 134.833 |  |
| ukb-b-9405 | rs1799923 | G | A | 0.00281552 | 0.0171188 | 3 | 1.20E-09 | 36.968 |  |
| ukb-b-9405 | rs1834144 | A | C | 0.00185609 | -0.0146152 | 18 | 3.40E-15 | 62.003 |  |
| ukb-b-9405 | rs1861410 | T | C | 0.00180199 | -0.016009 | 2 | 6.40E-19 | 78.927 |  |
| ukb-b-9405 | rs1902066 | C | T | 0.00181038 | 0.0109526 | 6 | 1.40E-09 | 36.601 |  |
| ukb-b-9405 | rs1942826 | A | G | 0.00270011 | 0.0167972 | 18 | 4.90E-10 | 38.700 |  |
| ukb-b-9405 | rs2020942 | T | C | 0.00183573 | 0.0108469 | 17 | 3.40E-09 | 34.914 |  |
| ukb-b-9405 | rs2074881 | T | C | 0.00240193 | -0.0147612 | 19 | 8.00E-10 | 37.768 |  |
| ukb-b-9405 | rs2133561 | T | A | 0.00185284 | -0.0122441 | 5 | 3.90E-11 | 43.669 |  |
| ukb-b-9405 | rs215669 | A | G | 0.00184246 | -0.0125095 | 7 | 1.10E-11 | 46.098 |  |
| ukb-b-9405 | rs2161097 | T | C | 0.00180004 | 0.0142773 | 5 | 2.20E-15 | 62.911 |  |
| ukb-b-9405 | rs2172131 | C | T | 0.00181299 | -0.0121742 | 10 | 1.90E-11 | 45.091 |  |
| ukb-b-9405 | rs2180454 | C | T | 0.00213539 | 0.0179823 | 14 | 3.70E-17 | 70.915 |  |
| ukb-b-9405 | rs2183947 | A | G | 0.00213628 | -0.0220783 | 6 | 4.90E-25 | 106.811 |  |
| ukb-b-9405 | rs2225909 | C | T | 0.00213642 | 0.015797 | 11 | 1.40E-13 | 54.673 |  |
| ukb-b-9405 | rs2302209 | T | C | 0.00197713 | 0.0198329 | 19 | 1.10E-23 | 100.624 |  |
| ukb-b-9405 | rs2306593 | T | C | 0.00179509 | -0.0152919 | 17 | 1.60E-17 | 72.569 |  |
| ukb-b-9405 | rs2307111 | C | T | 0.0018299 | -0.0239722 | 5 | 3.30E-39 | 171.617 |  |
| ukb-b-9405 | rs2376885 | A | G | 0.00191252 | -0.0106223 | 16 | 2.80E-08 | 30.848 |  |
| ukb-b-9405 | rs2439823 | G | A | 0.00180145 | 0.0155254 | 10 | 6.80E-18 | 74.275 |  |
| ukb-b-9405 | rs245767 | G | A | 0.00201635 | 0.0145976 | 5 | 4.50E-13 | 52.412 |  |
| ukb-b-9405 | rs2470549 | C | T | 0.00182105 | -0.0119541 | 3 | 5.20E-11 | 43.091 |  |
| ukb-b-9405 | rs2470946 | T | G | 0.00182473 | 0.011687 | 7 | 1.50E-10 | 41.021 |  |
| ukb-b-9405 | rs2482704 | T | G | 0.00180618 | -0.0115642 | 9 | 1.50E-10 | 40.993 |  |
| ukb-b-9405 | rs2568958 | A | G | 0.00182184 | 0.0169206 | 1 | 1.60E-20 | 86.260 |  |
| ukb-b-9405 | rs2584205 | A | G | 0.00202662 | 0.0111592 | 18 | 3.70E-08 | 30.319 |  |
| ukb-b-9405 | rs2678204 | G | T | 0.00188488 | 0.0157074 | 1 | 7.90E-17 | 69.445 |  |
| ukb-b-9405 | rs2696309 | C | T | 0.00199327 | 0.0112571 | 10 | 1.60E-08 | 31.895 |  |
| ukb-b-9405 | rs2725371 | G | A | 0.00195255 | -0.0154452 | 8 | 2.60E-15 | 62.572 |  |
| ukb-b-9405 | rs2744938 | G | A | 0.00251588 | 0.0319686 | 6 | 5.40E-37 | 161.461 |  |
| ukb-b-9405 | rs28350 | G | A | 0.0023374 | -0.0139376 | 3 | 2.50E-09 | 35.556 |  |
| ukb-b-9405 | rs28366156 | C | T | 0.00265145 | -0.0187659 | 6 | 1.50E-12 | 50.092 |  |
| ukb-b-9405 | rs28375268 | T | G | 0.00187766 | -0.0130789 | 16 | 3.30E-12 | 48.519 |  |
| ukb-b-9405 | rs28489620 | A | G | 0.00198899 | -0.0124131 | 22 | 4.40E-10 | 38.949 |  |
| ukb-b-9405 | rs28580375 | G | C | 0.00216777 | 0.0126069 | 8 | 6.00E-09 | 33.821 |  |
| ukb-b-9405 | rs2861692 | C | T | 0.00199772 | -0.0166517 | 2 | 7.70E-17 | 69.478 |  |
| ukb-b-9405 | rs2903738 | T | A | 0.00215663 | -0.0133061 | 19 | 6.80E-10 | 38.067 |  |
| ukb-b-9405 | rs3087523 | A | G | 0.00271786 | 0.016586 | 2 | 1.00E-09 | 37.242 |  |
| ukb-b-9405 | rs308911 | G | A | 0.00198055 | -0.0114749 | 2 | 6.90E-09 | 33.568 |  |
| ukb-b-9405 | rs3113509 | T | C | 0.00201975 | -0.0123292 | 4 | 1.00E-09 | 37.263 |  |
| ukb-b-9405 | rs319775 | C | T | 0.0018335 | 0.0101556 | 17 | 3.00E-08 | 30.680 |  |
| ukb-b-9405 | rs3212038 | G | A | 0.00191072 | 0.0126546 | 14 | 3.50E-11 | 43.863 |  |
| ukb-b-9405 | rs34045288 | T | C | 0.00189485 | 0.0203746 | 6 | 5.80E-27 | 115.619 |  |
| ukb-b-9405 | rs34140906 | C | T | 0.00238486 | -0.0179391 | 13 | 5.40E-14 | 56.582 |  |
| ukb-b-9405 | rs34234296 | A | G | 0.00184833 | -0.0131214 | 2 | 1.30E-12 | 50.397 |  |
| ukb-b-9405 | rs34483452 | A | C | 0.0026269 | 0.0270483 | 5 | 7.30E-25 | 106.021 |  |
| ukb-b-9405 | rs34517439 | A | C | 0.00276165 | 0.0305491 | 1 | 1.90E-28 | 122.366 |  |
| ukb-b-9405 | rs34882821 | T | G | 0.00189644 | 0.0106237 | 9 | 2.10E-08 | 31.381 |  |
| ukb-b-9405 | rs34994596 | C | T | 0.00195866 | -0.014559 | 15 | 1.10E-13 | 55.252 |  |
| ukb-b-9405 | rs35023999 | C | A | 0.00178977 | -0.0113409 | 11 | 2.40E-10 | 40.151 |  |
| ukb-b-9405 | rs35216639 | A | C | 0.00284261 | 0.0168196 | 1 | 3.30E-09 | 35.010 |  |
| ukb-b-9405 | rs35243581 | T | C | 0.00192251 | 0.0173643 | 11 | 1.70E-19 | 81.579 |  |
| ukb-b-9405 | rs35681682 | C | T | 0.00177268 | -0.0101534 | 2 | 1.00E-08 | 32.807 |  |
| ukb-b-9405 | rs35882248 | T | C | 0.00191956 | 0.0157088 | 2 | 2.80E-16 | 66.970 |  |
| ukb-b-9405 | rs36007635 | A | G | 0.00259543 | -0.0165685 | 6 | 1.70E-10 | 40.752 |  |
| ukb-b-9405 | rs36061954 | T | C | 0.00182669 | 0.0114574 | 8 | 3.60E-10 | 39.341 |  |
| ukb-b-9405 | rs36140 | C | A | 0.001867 | 0.0111762 | 5 | 2.10E-09 | 35.834 |  |
| ukb-b-9405 | rs36165342 | C | T | 0.00178943 | 0.0107118 | 12 | 2.10E-09 | 35.834 |  |
| ukb-b-9405 | rs3764002 | T | C | 0.00203505 | -0.0160772 | 12 | 2.80E-15 | 62.412 |  |
| ukb-b-9405 | rs3768321 | T | G | 0.00224849 | 0.0176726 | 1 | 3.80E-15 | 61.776 |  |
| ukb-b-9405 | rs3784692 | T | C | 0.00182662 | 0.0185824 | 15 | 2.60E-24 | 103.492 |  |
| ukb-b-9405 | rs3806114 | A | G | 0.00192005 | -0.0108144 | 6 | 1.80E-08 | 31.723 |  |
| ukb-b-9405 | rs3807566 | T | G | 0.00180583 | -0.012149 | 7 | 1.70E-11 | 45.261 |  |
| ukb-b-9405 | rs3814883 | T | C | 0.00179535 | 0.0239816 | 16 | 1.10E-40 | 178.426 |  |
| ukb-b-9405 | rs3816760 | A | G | 0.00193927 | 0.0133538 | 12 | 5.70E-12 | 47.417 |  |
| ukb-b-9405 | rs3826408 | T | C | 0.00179579 | 0.0112249 | 17 | 4.10E-10 | 39.071 |  |
| ukb-b-9405 | rs3845344 | T | C | 0.00182845 | 0.0107371 | 1 | 4.30E-09 | 34.483 |  |
| ukb-b-9405 | rs3866805 | A | C | 0.00187021 | 0.010421 | 1 | 2.50E-08 | 31.048 |  |
| ukb-b-9405 | rs3935190 | A | G | 0.00180625 | -0.0126195 | 17 | 2.80E-12 | 48.812 |  |
| ukb-b-9405 | rs3936510 | T | G | 0.0022268 | 0.0137147 | 5 | 7.30E-10 | 37.932 |  |
| ukb-b-9405 | rs400031 | G | A | 0.00215599 | 0.012086 | 5 | 2.10E-08 | 31.425 |  |
| ukb-b-9405 | rs40067 | A | G | 0.00238663 | -0.0156125 | 5 | 6.10E-11 | 42.793 |  |
| ukb-b-9405 | rs4017425 | T | C | 0.00179274 | -0.0101269 | 3 | 1.60E-08 | 31.909 |  |
| ukb-b-9405 | rs4072917 | A | G | 0.0017994 | 0.0117189 | 8 | 7.40E-11 | 42.415 |  |
| ukb-b-9405 | rs4075353 | A | G | 0.00189213 | -0.0105885 | 10 | 2.20E-08 | 31.316 |  |
| ukb-b-9405 | rs41279738 | G | T | 0.00563338 | 0.0522591 | 1 | 1.70E-20 | 86.057 |  |
| ukb-b-9405 | rs4148155 | G | A | 0.00281242 | -0.0189755 | 4 | 1.50E-11 | 45.522 |  |
| ukb-b-9405 | rs4290163 | T | G | 0.00183305 | 0.0113777 | 10 | 5.40E-10 | 38.527 |  |
| ukb-b-9405 | rs429343 | G | A | 0.00180931 | -0.0124509 | 2 | 5.90E-12 | 47.356 |  |
| ukb-b-9405 | rs429358 | C | T | 0.00248126 | -0.0271422 | 19 | 7.50E-28 | 119.659 |  |
| ukb-b-9405 | rs4344019 | G | A | 0.00324046 | 0.0200862 | 7 | 5.70E-10 | 38.422 |  |
| ukb-b-9405 | rs4456769 | T | C | 0.0019003 | 0.0134001 | 20 | 1.80E-12 | 49.725 |  |
| ukb-b-9405 | rs4469245 | T | A | 0.00189126 | -0.0115211 | 5 | 1.10E-09 | 37.110 |  |
| ukb-b-9405 | rs4482463 | A | C | 0.00335821 | -0.0258908 | 2 | 1.30E-14 | 59.440 |  |
| ukb-b-9405 | rs4525978 | T | C | 0.00203018 | -0.0113759 | 4 | 2.10E-08 | 31.398 |  |
| ukb-b-9405 | rs4527444 | G | A | 0.00179433 | 0.0105243 | 4 | 4.50E-09 | 34.402 |  |
| ukb-b-9405 | rs4552632 | A | G | 0.00184128 | -0.0101695 | 5 | 3.30E-08 | 30.504 |  |
| ukb-b-9405 | rs4689465 | C | T | 0.00178976 | -0.0108689 | 4 | 1.30E-09 | 36.879 |  |
| ukb-b-9405 | rs4706004 | G | A | 0.00216831 | -0.0134593 | 5 | 5.40E-10 | 38.530 |  |
| ukb-b-9405 | rs4718964 | T | G | 0.00182202 | 0.0122483 | 7 | 1.80E-11 | 45.190 |  |
| ukb-b-9405 | rs4722398 | T | C | 0.00260196 | 0.0168104 | 7 | 1.00E-10 | 41.740 |  |
| ukb-b-9405 | rs4742782 | G | C | 0.00192172 | 0.0124912 | 9 | 8.00E-11 | 42.250 |  |
| ukb-b-9405 | rs484455 | A | G | 0.00179638 | -0.0115336 | 13 | 1.40E-10 | 41.222 |  |
| ukb-b-9405 | rs4844809 | C | G | 0.00263686 | 0.0158367 | 1 | 1.90E-09 | 36.071 |  |
| ukb-b-9405 | rs4851283 | G | C | 0.00193525 | -0.0173961 | 2 | 2.50E-19 | 80.803 |  |
| ukb-b-9405 | rs4876611 | G | A | 0.0019947 | 0.0150085 | 8 | 5.30E-14 | 56.613 |  |
| ukb-b-9405 | rs4900715 | A | G | 0.00179331 | -0.0114279 | 14 | 1.90E-10 | 40.609 |  |
| ukb-b-9405 | rs4908672 | T | C | 0.00183009 | 0.0113966 | 1 | 4.70E-10 | 38.780 |  |
| ukb-b-9405 | rs520478 | T | G | 0.00197262 | -0.0125051 | 6 | 2.30E-10 | 40.187 |  |
| ukb-b-9405 | rs539515 | C | A | 0.00221181 | 0.0378223 | 1 | 1.50E-65 | 292.415 |  |
| ukb-b-9405 | rs55726687 | A | G | 0.00219529 | 0.0199369 | 12 | 1.10E-19 | 82.477 |  |
| ukb-b-9405 | rs55794894 | A | G | 0.00261481 | -0.014525 | 7 | 2.80E-08 | 30.857 |  |
| ukb-b-9405 | rs557951 | G | T | 0.00193163 | 0.0120789 | 3 | 4.00E-10 | 39.103 |  |
| ukb-b-9405 | rs559231 | T | G | 0.00184107 | 0.0107518 | 18 | 5.20E-09 | 34.105 |  |
| ukb-b-9405 | rs56803094 | G | A | 0.00214599 | -0.0127745 | 15 | 2.60E-09 | 35.435 |  |
| ukb-b-9405 | rs57636386 | C | T | 0.00324088 | -0.0309067 | 18 | 1.50E-21 | 90.945 |  |
| ukb-b-9405 | rs587271 | T | C | 0.0020079 | 0.0118054 | 1 | 4.10E-09 | 34.568 |  |
| ukb-b-9405 | rs58862095 | T | C | 0.00181678 | -0.0165812 | 7 | 7.10E-20 | 83.297 |  |
| ukb-b-9405 | rs588660 | A | G | 0.00181174 | 0.0155276 | 1 | 1.00E-17 | 73.454 |  |
| ukb-b-9405 | rs59068084 | T | G | 0.00181938 | 0.0101403 | 4 | 2.50E-08 | 31.064 |  |
| ukb-b-9405 | rs59104534 | T | C | 0.00196197 | 0.0107189 | 8 | 4.70E-08 | 29.848 |  |
| ukb-b-9405 | rs6001877 | A | G | 0.00189657 | -0.010579 | 22 | 2.40E-08 | 31.114 |  |
| ukb-b-9405 | rs6030803 | C | T | 0.00270327 | -0.0176808 | 20 | 6.10E-11 | 42.778 |  |
| ukb-b-9405 | rs6069037 | A | C | 0.00202001 | -0.011125 | 20 | 3.60E-08 | 30.331 |  |
| ukb-b-9405 | rs61223906 | A | G | 0.00188655 | -0.0108726 | 7 | 8.30E-09 | 33.215 |  |
| ukb-b-9405 | rs61813324 | T | C | 0.00264443 | 0.0219762 | 1 | 9.50E-17 | 69.062 |  |
| ukb-b-9405 | rs61903695 | G | A | 0.00205497 | 0.0134514 | 11 | 5.90E-11 | 42.847 |  |
| ukb-b-9405 | rs61969511 | A | G | 0.0020127 | 0.011857 | 13 | 3.80E-09 | 34.705 |  |
| ukb-b-9405 | rs61992671 | G | A | 0.00187164 | -0.0130005 | 14 | 3.80E-12 | 48.248 |  |
| ukb-b-9405 | rs62072003 | T | C | 0.00256295 | 0.0144325 | 17 | 1.80E-08 | 31.710 |  |
| ukb-b-9405 | rs62243489 | G | T | 0.00204876 | -0.0155648 | 3 | 3.00E-14 | 57.717 |  |
| ukb-b-9405 | rs62246311 | A | G | 0.00294652 | 0.0204929 | 3 | 3.50E-12 | 48.371 |  |
| ukb-b-9405 | rs62261725 | G | A | 0.00190872 | -0.0148698 | 3 | 6.70E-15 | 60.691 |  |
| ukb-b-9405 | rs6493498 | C | T | 0.001805 | -0.013082 | 15 | 4.20E-13 | 52.528 |  |
| ukb-b-9405 | rs649458 | A | T | 0.00256951 | -0.018179 | 1 | 1.50E-12 | 50.054 |  |
| ukb-b-9405 | rs6536575 | C | T | 0.00178995 | 0.0108432 | 4 | 1.40E-09 | 36.697 |  |
| ukb-b-9405 | rs6551304 | G | A | 0.00239416 | 0.016827 | 3 | 2.10E-12 | 49.398 |  |
| ukb-b-9405 | rs6567160 | C | T | 0.00211824 | 0.0451644 | 18 | 7.19E-101 | 454.613 |  |
| ukb-b-9405 | rs6575340 | A | G | 0.00186502 | 0.0161584 | 14 | 4.60E-18 | 75.064 |  |
| ukb-b-9405 | rs6669341 | G | A | 0.0018097 | -0.0125214 | 1 | 4.50E-12 | 47.873 |  |
| ukb-b-9405 | rs6682438 | C | T | 0.00190203 | 0.0124771 | 1 | 5.40E-11 | 43.032 |  |
| ukb-b-9405 | rs6693294 | G | A | 0.00192843 | -0.0170126 | 1 | 1.10E-18 | 77.828 |  |
| ukb-b-9405 | rs6739755 | G | A | 0.00182885 | -0.0159241 | 2 | 3.10E-18 | 75.815 |  |
| ukb-b-9405 | rs67609008 | C | T | 0.00199233 | 0.011102 | 10 | 2.50E-08 | 31.051 |  |
| ukb-b-9405 | rs67632512 | A | C | 0.00281561 | 0.0165927 | 5 | 3.80E-09 | 34.729 |  |
| ukb-b-9405 | rs6791983 | A | C | 0.00205988 | 0.0123148 | 3 | 2.30E-09 | 35.741 |  |
| ukb-b-9405 | rs6799080 | A | G | 0.00186721 | 0.0102307 | 3 | 4.30E-08 | 30.021 |  |
| ukb-b-9405 | rs6846041 | G | C | 0.00191467 | 0.0123073 | 4 | 1.30E-10 | 41.318 |  |
| ukb-b-9405 | rs6849518 | T | C | 0.00270973 | 0.0218636 | 4 | 7.10E-16 | 65.102 |  |
| ukb-b-9405 | rs6938973 | C | T | 0.001827 | 0.0120106 | 6 | 4.90E-11 | 43.217 |  |
| ukb-b-9405 | rs7034554 | G | A | 0.00184813 | -0.0112644 | 9 | 1.10E-09 | 37.149 |  |
| ukb-b-9405 | rs703984 | C | G | 0.00181967 | -0.011472 | 10 | 2.90E-10 | 39.746 |  |
| ukb-b-9405 | rs704061 | C | T | 0.00179659 | 0.0146223 | 12 | 4.00E-16 | 66.242 |  |
| ukb-b-9405 | rs7070670 | T | C | 0.00191737 | -0.0120318 | 10 | 3.50E-10 | 39.378 |  |
| ukb-b-9405 | rs7115013 | T | C | 0.00180461 | -0.0106394 | 11 | 3.70E-09 | 34.759 |  |
| ukb-b-9405 | rs7132908 | A | G | 0.00183998 | 0.0215129 | 12 | 1.40E-31 | 136.701 |  |
| ukb-b-9405 | rs71495038 | A | G | 0.00335663 | 0.0223778 | 10 | 2.60E-11 | 44.446 |  |
| ukb-b-9405 | rs7169847 | T | G | 0.00186771 | -0.0102703 | 15 | 3.80E-08 | 30.238 |  |
| ukb-b-9405 | rs7171864 | A | G | 0.00189898 | 0.0128894 | 15 | 1.10E-11 | 46.071 |  |
| ukb-b-9405 | rs7206608 | G | C | 0.00191641 | 0.0120004 | 16 | 3.80E-10 | 39.212 |  |
| ukb-b-9405 | rs7218014 | C | T | 0.00225393 | 0.0224089 | 17 | 2.70E-23 | 98.846 |  |
| ukb-b-9405 | rs7259070 | C | T | 0.00184133 | 0.0153811 | 19 | 6.60E-17 | 69.777 |  |
| ukb-b-9405 | rs72617140 | C | A | 0.00217889 | 0.0152073 | 2 | 3.00E-12 | 48.712 |  |
| ukb-b-9405 | rs72618637 | A | T | 0.00231667 | -0.0129811 | 2 | 2.10E-08 | 31.397 |  |
| ukb-b-9405 | rs72634826 | A | G | 0.00206456 | -0.0148957 | 1 | 5.40E-13 | 52.056 |  |
| ukb-b-9405 | rs72892910 | T | G | 0.00237148 | 0.0301404 | 6 | 5.20E-37 | 161.532 |  |
| ukb-b-9405 | rs72959041 | A | G | 0.00419212 | 0.0302176 | 6 | 5.70E-13 | 51.958 |  |
| ukb-b-9405 | rs72976986 | A | G | 0.00230334 | -0.0157587 | 19 | 7.80E-12 | 46.808 |  |
| ukb-b-9405 | rs73052033 | C | T | 0.00230513 | -0.0210096 | 3 | 7.90E-20 | 83.070 |  |
| ukb-b-9405 | rs73068448 | T | C | 0.00241309 | -0.0153436 | 7 | 2.00E-10 | 40.430 |  |
| ukb-b-9405 | rs73142879 | T | C | 0.00228107 | -0.0241942 | 20 | 2.80E-26 | 112.498 |  |
| ukb-b-9405 | rs7324067 | C | T | 0.00210064 | 0.0121297 | 13 | 7.70E-09 | 33.342 |  |
| ukb-b-9405 | rs735033 | G | A | 0.00184312 | -0.0102658 | 12 | 2.50E-08 | 31.023 |  |
| ukb-b-9405 | rs7372674 | A | C | 0.00186339 | 0.0118947 | 3 | 1.70E-10 | 40.747 |  |
| ukb-b-9405 | rs7377083 | A | C | 0.00181913 | 0.0143396 | 4 | 3.20E-15 | 62.136 |  |
| ukb-b-9405 | rs73985439 | C | A | 0.00193905 | 0.0124046 | 2 | 1.60E-10 | 40.925 |  |
| ukb-b-9405 | rs74395133 | C | T | 0.00263949 | -0.0162995 | 3 | 6.60E-10 | 38.134 |  |
| ukb-b-9405 | rs7442885 | G | C | 0.00218339 | -0.0204724 | 5 | 6.80E-21 | 87.917 |  |
| ukb-b-9405 | rs7498044 | A | G | 0.00219298 | -0.0151498 | 15 | 4.90E-12 | 47.725 |  |
| ukb-b-9405 | rs7498665 | G | A | 0.00182769 | 0.026616 | 16 | 4.90E-48 | 212.071 |  |
| ukb-b-9405 | rs75035127 | G | A | 0.0052036 | -0.0333436 | 1 | 1.50E-10 | 41.060 |  |
| ukb-b-9405 | rs7519259 | A | G | 0.00179634 | 0.0126703 | 1 | 1.70E-12 | 49.750 |  |
| ukb-b-9405 | rs7537581 | A | C | 0.00180248 | 0.0107362 | 1 | 2.60E-09 | 35.478 |  |
| ukb-b-9405 | rs7539903 | A | T | 0.00183572 | -0.0107184 | 1 | 5.30E-09 | 34.092 |  |
| ukb-b-9405 | rs756717 | A | G | 0.00184896 | -0.0107152 | 16 | 6.80E-09 | 33.585 |  |
| ukb-b-9405 | rs76040172 | A | G | 0.00399143 | -0.0294934 | 21 | 1.50E-13 | 54.600 |  |
| ukb-b-9405 | rs76286777 | C | T | 0.0021623 | 0.0234759 | 2 | 1.80E-27 | 117.873 |  |
| ukb-b-9405 | rs7630382 | T | C | 0.00179336 | 0.013362 | 3 | 9.30E-14 | 55.515 |  |
| ukb-b-9405 | rs765876 | G | A | 0.00178785 | -0.00980862 | 6 | 4.10E-08 | 30.099 |  |
| ukb-b-9405 | rs76895963 | G | T | 0.00693063 | 0.0484187 | 12 | 2.80E-12 | 48.807 |  |
| ukb-b-9405 | rs7707394 | A | G | 0.00186285 | -0.0167827 | 5 | 2.10E-19 | 81.165 |  |
| ukb-b-9405 | rs7708584 | G | A | 0.00180534 | -0.0121976 | 5 | 1.40E-11 | 45.649 |  |
| ukb-b-9405 | rs77165542 | T | C | 0.00488088 | -0.0700663 | 2 | 9.90E-47 | 206.073 |  |
| ukb-b-9405 | rs7752202 | T | C | 0.00253183 | 0.0177008 | 6 | 2.70E-12 | 48.878 |  |
| ukb-b-9405 | rs7755574 | T | G | 0.00198683 | 0.010917 | 6 | 3.90E-08 | 30.192 |  |
| ukb-b-9405 | rs784257 | C | T | 0.00230615 | 0.0161785 | 18 | 2.30E-12 | 49.215 |  |
| ukb-b-9405 | rs7845090 | A | G | 0.00197942 | -0.0195133 | 8 | 6.30E-23 | 97.182 |  |
| ukb-b-9405 | rs7925100 | A | G | 0.00182953 | 0.0140407 | 11 | 1.70E-14 | 58.898 |  |
| ukb-b-9405 | rs7933085 | G | A | 0.00179888 | 0.0108889 | 11 | 1.40E-09 | 36.641 |  |
| ukb-b-9405 | rs7966251 | A | G | 0.00205522 | -0.0115986 | 12 | 1.70E-08 | 31.849 |  |
| ukb-b-9405 | rs8013377 | C | A | 0.002018 | -0.0166104 | 14 | 1.90E-16 | 67.751 |  |
| ukb-b-9405 | rs8024137 | T | A | 0.00250296 | 0.0136852 | 15 | 4.60E-08 | 29.895 |  |
| ukb-b-9405 | rs80243702 | A | G | 0.00245648 | 0.0151663 | 15 | 6.70E-10 | 38.118 |  |
| ukb-b-9405 | rs8078135 | T | C | 0.00179655 | -0.0101458 | 17 | 1.60E-08 | 31.893 |  |
| ukb-b-9405 | rs8097672 | T | A | 0.00255407 | 0.0167802 | 18 | 5.00E-11 | 43.165 |  |
| ukb-b-9405 | rs815163 | C | T | 0.00179812 | -0.0131383 | 1 | 2.70E-13 | 53.388 |  |
| ukb-b-9405 | rs8192675 | C | T | 0.00196858 | 0.0159923 | 3 | 4.50E-16 | 65.996 |  |
| ukb-b-9405 | rs852042 | G | A | 0.00209164 | -0.0115951 | 20 | 3.00E-08 | 30.731 |  |
| ukb-b-9405 | rs852983 | A | G | 0.00179325 | -0.00983151 | 5 | 4.20E-08 | 30.058 |  |
| ukb-b-9405 | rs862227 | G | A | 0.00179141 | -0.0109798 | 16 | 8.80E-10 | 37.566 |  |
| ukb-b-9405 | rs862320 | T | C | 0.0018218 | -0.0180264 | 16 | 4.40E-23 | 97.908 |  |
| ukb-b-9405 | rs876605 | G | A | 0.00203598 | -0.0111634 | 5 | 4.20E-08 | 30.064 |  |
| ukb-b-9405 | rs879620 | T | C | 0.00184223 | 0.0194431 | 16 | 4.90E-26 | 111.389 |  |
| ukb-b-9405 | rs883403 | C | T | 0.00247511 | -0.0176676 | 7 | 9.50E-13 | 50.953 |  |
| ukb-b-9405 | rs894736 | G | A | 0.00186806 | 0.0157371 | 12 | 3.60E-17 | 70.969 |  |
| ukb-b-9405 | rs923994 | G | A | 0.0021745 | -0.0130094 | 4 | 2.20E-09 | 35.793 |  |
| ukb-b-9405 | rs9289630 | C | G | 0.00183898 | 0.0144758 | 3 | 3.50E-15 | 61.963 |  |
| ukb-b-9405 | rs9294260 | A | G | 0.00179925 | 0.0131781 | 6 | 2.40E-13 | 53.644 |  |
| ukb-b-9405 | rs9308964 | T | C | 0.00180578 | -0.0099592 | 2 | 3.50E-08 | 30.417 |  |
| ukb-b-9405 | rs9316661 | C | T | 0.00224739 | -0.0156101 | 13 | 3.80E-12 | 48.245 |  |
| ukb-b-9405 | rs9370243 | T | G | 0.00325673 | 0.0195525 | 6 | 1.90E-09 | 36.045 |  |
| ukb-b-9405 | rs9378676 | C | A | 0.00211353 | 0.0130316 | 6 | 7.00E-10 | 38.017 |  |
| ukb-b-9405 | rs945211 | C | G | 0.0018363 | 0.0100787 | 1 | 4.10E-08 | 30.125 |  |
| ukb-b-9405 | rs9478496 | C | T | 0.00242098 | 0.0145491 | 6 | 1.90E-09 | 36.115 |  |
| ukb-b-9405 | rs9568867 | A | G | 0.00268971 | 0.022614 | 13 | 4.20E-17 | 70.688 |  |
| ukb-b-9405 | rs9584870 | C | T | 0.00189234 | -0.0108139 | 13 | 1.10E-08 | 32.656 |  |
| ukb-b-9405 | rs9654453 | C | T | 0.00266903 | 0.0170405 | 5 | 1.70E-10 | 40.762 |  |
| ukb-b-9405 | rs9673839 | G | A | 0.00179863 | 0.0109063 | 16 | 1.30E-09 | 36.768 |  |
| ukb-b-9405 | rs9814758 | G | T | 0.00187521 | -0.0111552 | 3 | 2.70E-09 | 35.388 |  |
| ukb-b-9405 | rs9835772 | T | A | 0.00208107 | 0.0121296 | 3 | 5.60E-09 | 33.972 |  |
| ukb-b-9405 | rs9843653 | C | T | 0.00178819 | 0.0195793 | 3 | 6.70E-28 | 119.886 |  |
| ukb-b-9405 | rs9888533 | T | C | 0.00182556 | 0.0108325 | 13 | 3.00E-09 | 35.210 |  |
| ukb-b-9405 | rs9902846 | T | C | 0.00192994 | 0.0133756 | 17 | 4.20E-12 | 48.033 |  |
| ukb-b-9405 | rs9916444 | G | C | 0.0018902 | 0.0114738 | 17 | 1.30E-09 | 36.847 |  |
| ukb-b-9405 | rs9926784 | C | T | 0.00230452 | -0.0132587 | 16 | 8.70E-09 | 33.101 |  |
| Group 2 | | | | | | | | | |
| ID | SNP | Effect_allele | Other_allele | Se | Beta | Chr | *P*_val | F | Total F |
| ebi-a-GCST90014020 | rs10128597 | A | G | 0.00209557 | -0.0166279 | 11 | 2.11E-15 | 62.961 | 54.88744988 |
| ebi-a-GCST90014020 | rs10132280 | A | C | 0.0020337 | -0.0164064 | 14 | 7.19E-16 | 65.081 |  |
| ebi-a-GCST90014020 | rs10153031 | G | T | 0.00190604 | 0.0182365 | 15 | 1.09E-21 | 91.542 |  |
| ebi-a-GCST90014020 | rs10182458 | G | A | 0.00186199 | 0.0198069 | 2 | 1.99E-26 | 113.156 |  |
| ebi-a-GCST90014020 | rs10248298 | A | C | 0.00192688 | 0.0131809 | 7 | 7.89E-12 | 46.793 |  |
| ebi-a-GCST90014020 | rs10269774 | A | G | 0.00198488 | 0.0129258 | 7 | 7.41E-11 | 42.408 |  |
| ebi-a-GCST90014020 | rs10422861 | T | C | 0.00197007 | 0.0110548 | 19 | 2.01E-08 | 31.488 |  |
| ebi-a-GCST90014020 | rs1048013 | T | C | 0.0018722 | 0.0110185 | 2 | 3.97E-09 | 34.637 |  |
| ebi-a-GCST90014020 | rs10506965 | G | T | 0.00186915 | -0.0158288 | 12 | 2.49E-17 | 71.715 |  |
| ebi-a-GCST90014020 | rs10530053 | CTTTTT | C | 0.00189502 | 0.0180594 | 16 | 1.57E-21 | 90.819 |  |
| ebi-a-GCST90014020 | rs1056441 | C | T | 0.0019776 | 0.0134395 | 20 | 1.08E-11 | 46.184 |  |
| ebi-a-GCST90014020 | rs1073331 | G | A | 0.00188252 | -0.011642 | 16 | 6.24E-10 | 38.245 |  |
| ebi-a-GCST90014020 | rs10756713 | G | A | 0.00187848 | -0.0150071 | 9 | 1.36E-15 | 63.823 |  |
| ebi-a-GCST90014020 | rs10780248 | A | G | 0.00187186 | -0.0110596 | 9 | 3.45E-09 | 34.909 |  |
| ebi-a-GCST90014020 | rs10787738 | T | C | 0.00216356 | 0.0144743 | 10 | 2.23E-11 | 44.757 |  |
| ebi-a-GCST90014020 | rs10894605 | G | A | 0.00188298 | 0.0111058 | 11 | 3.68E-09 | 34.786 |  |
| ebi-a-GCST90014020 | rs10898330 | T | C | 0.00186823 | -0.0111934 | 11 | 2.08E-09 | 35.897 |  |
| ebi-a-GCST90014020 | rs10936684 | A | G | 0.00198349 | -0.0115118 | 3 | 6.48E-09 | 33.684 |  |
| ebi-a-GCST90014020 | rs10945159 | T | C | 0.00205757 | 0.0132671 | 6 | 1.13E-10 | 41.576 |  |
| ebi-a-GCST90014020 | rs10947793 | G | A | 0.00193301 | -0.0122259 | 6 | 2.54E-10 | 40.003 |  |
| ebi-a-GCST90014020 | rs10954772 | C | T | 0.00201226 | -0.0146578 | 8 | 3.23E-13 | 53.060 |  |
| ebi-a-GCST90014020 | rs10957088 | C | T | 0.00253215 | 0.0149176 | 8 | 3.83E-09 | 34.707 |  |
| ebi-a-GCST90014020 | rs11030108 | G | A | 0.00198441 | -0.0248117 | 11 | 7.16E-36 | 156.333 |  |
| ebi-a-GCST90014020 | rs11056876 | G | A | 0.00230506 | 0.013053 | 12 | 1.49E-08 | 32.067 |  |
| ebi-a-GCST90014020 | rs11071546 | C | T | 0.00187283 | 0.0115621 | 15 | 6.68E-10 | 38.113 |  |
| ebi-a-GCST90014020 | rs11099020 | T | C | 0.00194157 | -0.0110748 | 4 | 1.17E-08 | 32.536 |  |
| ebi-a-GCST90014020 | rs111258054 | T | C | 0.00242493 | 0.0165052 | 11 | 1.00E-11 | 46.328 |  |
| ebi-a-GCST90014020 | rs111260184 | A | G | 0.00187148 | 0.0102452 | 12 | 4.39E-08 | 29.969 |  |
| ebi-a-GCST90014020 | rs11160601 | T | C | 0.00322709 | 0.0201436 | 14 | 4.32E-10 | 38.963 |  |
| ebi-a-GCST90014020 | rs11216221 | G | A | 0.00405912 | 0.0245173 | 11 | 1.54E-09 | 36.482 |  |
| ebi-a-GCST90014020 | rs112566467 | T | C | 0.00228678 | 0.0188265 | 1 | 1.83E-16 | 67.778 |  |
| ebi-a-GCST90014020 | rs113784412 | T | C | 0.00201673 | 0.0144613 | 2 | 7.46E-13 | 51.418 |  |
| ebi-a-GCST90014020 | rs113866544 | C | T | 0.00370068 | 0.028472 | 17 | 1.43E-14 | 59.193 |  |
| ebi-a-GCST90014020 | rs114964326 | A | G | 0.0055405 | -0.0339599 | 2 | 8.82E-10 | 37.569 |  |
| ebi-a-GCST90014020 | rs115056380 | A | G | 0.00433247 | -0.0243843 | 1 | 1.82E-08 | 31.677 |  |
| ebi-a-GCST90014020 | rs11607476 | C | A | 0.00187029 | 0.0106982 | 11 | 1.06E-08 | 32.719 |  |
| ebi-a-GCST90014020 | rs1160863 | TTA | T | 0.00186878 | 0.0142377 | 12 | 2.56E-14 | 58.045 |  |
| ebi-a-GCST90014020 | rs11636611 | T | C | 0.00185743 | 0.0112866 | 15 | 1.23E-09 | 36.923 |  |
| ebi-a-GCST90014020 | rs11653367 | G | A | 0.00198696 | -0.0182133 | 17 | 4.89E-20 | 84.023 |  |
| ebi-a-GCST90014020 | rs11704728 | T | C | 0.00234079 | 0.0150712 | 22 | 1.21E-10 | 41.454 |  |
| ebi-a-GCST90014020 | rs11757278 | C | T | 0.00201848 | -0.0135678 | 6 | 1.80E-11 | 45.182 |  |
| ebi-a-GCST90014020 | rs11759152 | A | G | 0.00276456 | 0.0151099 | 6 | 4.61E-08 | 29.872 |  |
| ebi-a-GCST90014020 | rs1182199 | A | C | 0.00201663 | -0.0144063 | 7 | 9.08E-13 | 51.033 |  |
| ebi-a-GCST90014020 | rs11824092 | C | T | 0.00194401 | 0.0139447 | 11 | 7.33E-13 | 51.454 |  |
| ebi-a-GCST90014020 | rs11878507 | A | G | 0.00186162 | -0.0146738 | 19 | 3.22E-15 | 62.130 |  |
| ebi-a-GCST90014020 | rs11917587 | A | G | 0.00187973 | 0.0154906 | 3 | 1.71E-16 | 67.912 |  |
| ebi-a-GCST90014020 | rs11923804 | A | C | 0.00198754 | -0.012582 | 3 | 2.44E-10 | 40.074 |  |
| ebi-a-GCST90014020 | rs12044012 | A | G | 0.00199204 | -0.0122505 | 1 | 7.76E-10 | 37.819 |  |
| ebi-a-GCST90014020 | rs12072739 | G | A | 0.00223159 | 0.0174869 | 1 | 4.65E-15 | 61.404 |  |
| ebi-a-GCST90014020 | rs12088070 | T | C | 0.00202545 | 0.011437 | 1 | 1.64E-08 | 31.885 |  |
| ebi-a-GCST90014020 | rs12140153 | T | G | 0.00323157 | -0.0279147 | 1 | 5.71E-18 | 74.617 |  |
| ebi-a-GCST90014020 | rs1218822 | A | G | 0.00196234 | 0.0137486 | 13 | 2.45E-12 | 49.087 |  |
| ebi-a-GCST90014020 | rs12199502 | C | T | 0.00247696 | -0.0142156 | 6 | 9.52E-09 | 32.938 |  |
| ebi-a-GCST90014020 | rs1229984 | C | T | 0.00627503 | 0.0380954 | 4 | 1.27E-09 | 36.856 |  |
| ebi-a-GCST90014020 | rs12330631 | T | C | 0.00193201 | -0.0110388 | 3 | 1.11E-08 | 32.646 |  |
| ebi-a-GCST90014020 | rs12339822 | G | A | 0.00187171 | 0.0116343 | 9 | 5.10E-10 | 38.637 |  |
| ebi-a-GCST90014020 | rs12367809 | T | C | 0.00193264 | 0.0219231 | 12 | 7.98E-30 | 128.677 |  |
| ebi-a-GCST90014020 | rs12375196 | A | C | 0.0018887 | 0.0127804 | 7 | 1.32E-11 | 45.789 |  |
| ebi-a-GCST90014020 | rs12506689 | A | G | 0.00193014 | 0.0121834 | 4 | 2.75E-10 | 39.844 |  |
| ebi-a-GCST90014020 | rs12514473 | C | T | 0.00215848 | -0.0148009 | 5 | 7.03E-12 | 47.020 |  |
| ebi-a-GCST90014020 | rs12516350 | G | A | 0.00186671 | -0.0114715 | 5 | 7.98E-10 | 37.765 |  |
| ebi-a-GCST90014020 | rs12616638 | G | A | 0.00190159 | -0.0104379 | 2 | 4.04E-08 | 30.130 |  |
| ebi-a-GCST90014020 | rs12680342 | G | T | 0.00220737 | -0.0126567 | 8 | 9.82E-09 | 32.877 |  |
| ebi-a-GCST90014020 | rs12718572 | T | C | 0.00189783 | -0.0120621 | 7 | 2.07E-10 | 40.395 |  |
| ebi-a-GCST90014020 | rs12726165 | T | C | 0.00192324 | 0.0115314 | 1 | 2.02E-09 | 35.950 |  |
| ebi-a-GCST90014020 | rs12731208 | G | T | 0.00194919 | 0.0113729 | 1 | 5.39E-09 | 34.043 |  |
| ebi-a-GCST90014020 | rs12877270 | A | G | 0.00188375 | 0.0136897 | 13 | 3.67E-13 | 52.813 |  |
| ebi-a-GCST90014020 | rs12951079 | A | G | 0.00189785 | -0.0155826 | 17 | 2.20E-16 | 67.415 |  |
| ebi-a-GCST90014020 | rs13163306 | A | G | 0.00186355 | -0.0110365 | 5 | 3.17E-09 | 35.074 |  |
| ebi-a-GCST90014020 | rs1320903 | A | G | 0.0019977 | 0.0187779 | 3 | 5.47E-21 | 88.355 |  |
| ebi-a-GCST90014020 | rs1321521 | A | C | 0.00195141 | 0.0131604 | 6 | 1.54E-11 | 45.482 |  |
| ebi-a-GCST90014020 | rs1327259 | G | A | 0.00191548 | -0.0107205 | 6 | 2.18E-08 | 31.324 |  |
| ebi-a-GCST90014020 | rs1336486 | G | T | 0.00197607 | 0.0127375 | 13 | 1.15E-10 | 41.549 |  |
| ebi-a-GCST90014020 | rs13427822 | G | A | 0.00211349 | -0.0149809 | 2 | 1.36E-12 | 50.243 |  |
| ebi-a-GCST90014020 | rs1436348 | G | A | 0.00188493 | 0.0122897 | 3 | 7.03E-11 | 42.510 |  |
| ebi-a-GCST90014020 | rs1441264 | A | G | 0.00192836 | 0.0151611 | 13 | 3.77E-15 | 61.814 |  |
| ebi-a-GCST90014020 | rs144443274 | T | C | 0.00249619 | 0.0182195 | 17 | 2.90E-13 | 53.274 |  |
| ebi-a-GCST90014020 | rs147786161 | G | A | 0.00188238 | 0.011882 | 12 | 2.75E-10 | 39.844 |  |
| ebi-a-GCST90014020 | rs1490382 | G | A | 0.00191798 | -0.0111753 | 1 | 5.66E-09 | 33.949 |  |
| ebi-a-GCST90014020 | rs1522569 | G | T | 0.00240636 | -0.0133624 | 4 | 2.81E-08 | 30.835 |  |
| ebi-a-GCST90014020 | rs1559900 | T | C | 0.00205489 | 0.0129202 | 8 | 3.23E-10 | 39.533 |  |
| ebi-a-GCST90014020 | rs1571136 | T | C | 0.00187955 | 0.0108151 | 10 | 8.71E-09 | 33.110 |  |
| ebi-a-GCST90014020 | rs1625623 | T | C | 0.00194671 | 0.0108468 | 5 | 2.52E-08 | 31.046 |  |
| ebi-a-GCST90014020 | rs1652376 | T | G | 0.00186072 | -0.0191391 | 18 | 8.16E-25 | 105.799 |  |
| ebi-a-GCST90014020 | rs165722 | T | C | 0.00186594 | 0.0105585 | 22 | 1.53E-08 | 32.019 |  |
| ebi-a-GCST90014020 | rs16916303 | G | A | 0.00288728 | -0.0169347 | 9 | 4.48E-09 | 34.401 |  |
| ebi-a-GCST90014020 | rs17094222 | C | T | 0.00227558 | 0.0143328 | 10 | 3.00E-10 | 39.671 |  |
| ebi-a-GCST90014020 | rs17149254 | C | T | 0.00240871 | -0.0159031 | 7 | 4.05E-11 | 43.591 |  |
| ebi-a-GCST90014020 | rs1724557 | A | C | 0.00189502 | -0.0125658 | 4 | 3.33E-11 | 43.970 |  |
| ebi-a-GCST90014020 | rs17399739 | G | A | 0.0036487 | 0.0238767 | 10 | 5.99E-11 | 42.823 |  |
| ebi-a-GCST90014020 | rs1752169 | A | C | 0.00214965 | 0.0144599 | 9 | 1.74E-11 | 45.248 |  |
| ebi-a-GCST90014020 | rs17639546 | A | G | 0.00260594 | -0.0175466 | 3 | 1.66E-11 | 45.337 |  |
| ebi-a-GCST90014020 | rs17770336 | T | C | 0.00198068 | 0.0191746 | 9 | 3.64E-22 | 93.718 |  |
| ebi-a-GCST90014020 | rs1805123 | G | T | 0.00215484 | -0.0134472 | 7 | 4.36E-10 | 38.943 |  |
| ebi-a-GCST90014020 | rs1834144 | A | C | 0.0019222 | -0.0143554 | 18 | 8.13E-14 | 55.774 |  |
| ebi-a-GCST90014020 | rs184287715 | G | T | 0.00219954 | 0.0124248 | 12 | 1.62E-08 | 31.909 |  |
| ebi-a-GCST90014020 | rs186234792 | G | A | 0.0056667 | 0.0309274 | 11 | 4.82E-08 | 29.787 |  |
| ebi-a-GCST90014020 | rs188351692 | T | C | 0.00405714 | 0.0254743 | 11 | 3.41E-10 | 39.424 |  |
| ebi-a-GCST90014020 | rs1902066 | C | T | 0.0018823 | 0.0106493 | 6 | 1.54E-08 | 32.008 |  |
| ebi-a-GCST90014020 | rs1922879 | A | G | 0.00196939 | -0.0110155 | 7 | 2.23E-08 | 31.286 |  |
| ebi-a-GCST90014020 | rs1942826 | A | G | 0.00281675 | 0.0171312 | 18 | 1.19E-09 | 36.990 |  |
| ebi-a-GCST90014020 | rs200090476 | A | G | 0.0019433 | 0.0138767 | 1 | 9.28E-13 | 50.991 |  |
| ebi-a-GCST90014020 | rs2007833 | G | A | 0.00230209 | -0.0127211 | 10 | 3.28E-08 | 30.535 |  |
| ebi-a-GCST90014020 | rs201519328 | A | G | 0.00187376 | 0.0159828 | 8 | 1.47E-17 | 72.758 |  |
| ebi-a-GCST90014020 | rs2026752 | T | G | 0.00214591 | 0.0134813 | 13 | 3.34E-10 | 39.468 |  |
| ebi-a-GCST90014020 | rs2066295 | G | A | 0.0022153 | -0.0228124 | 6 | 7.22E-25 | 106.042 |  |
| ebi-a-GCST90014020 | rs215669 | A | G | 0.00191424 | -0.0129234 | 7 | 1.47E-11 | 45.579 |  |
| ebi-a-GCST90014020 | rs2172131 | C | T | 0.00188229 | -0.0126836 | 10 | 1.60E-11 | 45.406 |  |
| ebi-a-GCST90014020 | rs217669 | C | T | 0.00208513 | 0.0128558 | 14 | 7.03E-10 | 38.013 |  |
| ebi-a-GCST90014020 | rs2187449 | A | G | 0.00221044 | 0.0120805 | 11 | 4.62E-08 | 29.868 |  |
| ebi-a-GCST90014020 | rs2289379 | T | C | 0.00190547 | -0.0105034 | 7 | 3.54E-08 | 30.385 |  |
| ebi-a-GCST90014020 | rs2306537 | G | A | 0.00200622 | 0.0135199 | 12 | 1.59E-11 | 45.414 |  |
| ebi-a-GCST90014020 | rs2307111 | C | T | 0.00190378 | -0.0239454 | 5 | 2.80E-36 | 158.202 |  |
| ebi-a-GCST90014020 | rs236660 | C | T | 0.00194806 | 0.0176701 | 7 | 1.18E-19 | 82.276 |  |
| ebi-a-GCST90014020 | rs2370982 | T | C | 0.0022735 | 0.0223143 | 14 | 9.71E-23 | 96.333 |  |
| ebi-a-GCST90014020 | rs2404324 | G | A | 0.00257027 | -0.0186094 | 7 | 4.48E-13 | 52.421 |  |
| ebi-a-GCST90014020 | rs2439823 | G | A | 0.00186947 | 0.0154423 | 10 | 1.45E-16 | 68.232 |  |
| ebi-a-GCST90014020 | rs2456524 | T | C | 0.00263316 | 0.0150439 | 15 | 1.11E-08 | 32.641 |  |
| ebi-a-GCST90014020 | rs245767 | G | A | 0.00209568 | 0.0149359 | 5 | 1.03E-12 | 50.794 |  |
| ebi-a-GCST90014020 | rs2470946 | T | G | 0.00189135 | 0.0111576 | 7 | 3.65E-09 | 34.801 |  |
| ebi-a-GCST90014020 | rs2528787 | T | C | 0.00193039 | -0.0126455 | 13 | 5.72E-11 | 42.912 |  |
| ebi-a-GCST90014020 | rs2569993 | C | T | 0.0020001 | 0.0134039 | 3 | 2.06E-11 | 44.912 |  |
| ebi-a-GCST90014020 | rs2678204 | G | T | 0.00196409 | 0.0166782 | 1 | 2.04E-17 | 72.107 |  |
| ebi-a-GCST90014020 | rs2731238 | T | G | 0.00404977 | -0.0232909 | 12 | 8.86E-09 | 33.076 |  |
| ebi-a-GCST90014020 | rs2744938 | G | A | 0.00261833 | 0.0305147 | 6 | 2.18E-31 | 135.822 |  |
| ebi-a-GCST90014020 | rs28375268 | T | G | 0.00195455 | -0.0142212 | 16 | 3.44E-13 | 52.939 |  |
| ebi-a-GCST90014020 | rs284532 | G | T | 0.00186519 | -0.0107684 | 2 | 7.77E-09 | 33.332 |  |
| ebi-a-GCST90014020 | rs28489620 | A | G | 0.00205412 | -0.0127224 | 22 | 5.88E-10 | 38.361 |  |
| ebi-a-GCST90014020 | rs2861344 | A | G | 0.00185646 | 0.0115565 | 18 | 4.82E-10 | 38.751 |  |
| ebi-a-GCST90014020 | rs2861692 | C | T | 0.00208318 | -0.0166676 | 2 | 1.23E-15 | 64.017 |  |
| ebi-a-GCST90014020 | rs2962082 | A | G | 0.00186344 | -0.0102614 | 16 | 3.66E-08 | 30.324 |  |
| ebi-a-GCST90014020 | rs3004179 | G | A | 0.00189514 | 0.0117745 | 6 | 5.20E-10 | 38.601 |  |
| ebi-a-GCST90014020 | rs3030348 | CCTCAGTCT | C | 0.0024237 | -0.0161503 | 7 | 2.67E-11 | 44.402 |  |
| ebi-a-GCST90014020 | rs308911 | G | A | 0.00206269 | -0.0118731 | 2 | 8.61E-09 | 33.133 |  |
| ebi-a-GCST90014020 | rs3113509 | T | C | 0.00210337 | -0.0127687 | 4 | 1.27E-09 | 36.852 |  |
| ebi-a-GCST90014020 | rs34045288 | T | C | 0.00196813 | 0.0207973 | 6 | 4.24E-26 | 111.662 |  |
| ebi-a-GCST90014020 | rs34234296 | A | G | 0.00192625 | -0.0129962 | 2 | 1.51E-11 | 45.521 |  |
| ebi-a-GCST90014020 | rs34517439 | A | C | 0.00285242 | 0.0302012 | 1 | 3.39E-26 | 112.104 |  |
| ebi-a-GCST90014020 | rs34732995 | CTA | C | 0.00186401 | -0.0134553 | 5 | 5.26E-13 | 52.106 |  |
| ebi-a-GCST90014020 | rs34847111 | T | C | 0.0021532 | 0.0124083 | 2 | 8.28E-09 | 33.209 |  |
| ebi-a-GCST90014020 | rs34994596 | C | T | 0.00202678 | -0.0137728 | 15 | 1.08E-11 | 46.178 |  |
| ebi-a-GCST90014020 | rs35343344 | A | C | 0.00213387 | -0.0179443 | 19 | 4.13E-17 | 70.716 |  |
| ebi-a-GCST90014020 | rs35475612 | CTT | C | 0.0020069 | 0.0137241 | 10 | 8.01E-12 | 46.764 |  |
| ebi-a-GCST90014020 | rs35679975 | C | T | 0.00235985 | -0.0244469 | 20 | 3.79E-25 | 107.320 |  |
| ebi-a-GCST90014020 | rs35867081 | G | A | 0.00186432 | -0.0113488 | 17 | 1.15E-09 | 37.056 |  |
| ebi-a-GCST90014020 | rs35882248 | T | C | 0.002006 | 0.0164641 | 2 | 2.26E-16 | 67.362 |  |
| ebi-a-GCST90014020 | rs35972789 | A | C | 0.00487889 | -0.0292226 | 10 | 2.10E-09 | 35.875 |  |
| ebi-a-GCST90014020 | rs36156 | C | T | 0.00194407 | 0.0119633 | 5 | 7.57E-10 | 37.869 |  |
| ebi-a-GCST90014020 | rs369230 | T | G | 0.00202233 | 0.0110328 | 16 | 4.88E-08 | 29.762 |  |
| ebi-a-GCST90014020 | rs3770821 | C | T | 0.00198911 | 0.0130904 | 2 | 4.67E-11 | 43.310 |  |
| ebi-a-GCST90014020 | rs3774063 | T | C | 0.00308166 | 0.0207635 | 3 | 1.61E-11 | 45.397 |  |
| ebi-a-GCST90014020 | rs3776712 | C | T | 0.00211544 | -0.0116152 | 5 | 4.00E-08 | 30.148 |  |
| ebi-a-GCST90014020 | rs3814883 | T | C | 0.00186639 | 0.0254681 | 16 | 2.14E-42 | 186.204 |  |
| ebi-a-GCST90014020 | rs3826408 | T | C | 0.00185983 | 0.0113154 | 17 | 1.17E-09 | 37.016 |  |
| ebi-a-GCST90014020 | rs3993347 | C | T | 0.00194337 | -0.0137963 | 14 | 1.26E-12 | 50.398 |  |
| ebi-a-GCST90014020 | rs40067 | A | G | 0.00247747 | -0.0177159 | 5 | 8.63E-13 | 51.134 |  |
| ebi-a-GCST90014020 | rs4055791 | T | C | 0.0018808 | -0.0130472 | 13 | 4.00E-12 | 48.123 |  |
| ebi-a-GCST90014020 | rs4072917 | A | G | 0.00186572 | 0.0106757 | 8 | 1.05E-08 | 32.742 |  |
| ebi-a-GCST90014020 | rs41279738 | G | T | 0.0058677 | 0.0491105 | 1 | 5.78E-17 | 70.051 |  |
| ebi-a-GCST90014020 | rs4148155 | G | A | 0.00292008 | -0.0161582 | 4 | 3.14E-08 | 30.619 |  |
| ebi-a-GCST90014020 | rs429358 | C | T | 0.00255656 | -0.0247647 | 19 | 3.43E-22 | 93.833 |  |
| ebi-a-GCST90014020 | rs4435118 | A | G | 0.00217652 | 0.0132194 | 13 | 1.25E-09 | 36.889 |  |
| ebi-a-GCST90014020 | rs4456769 | T | C | 0.00196436 | 0.01315 | 20 | 2.17E-11 | 44.814 |  |
| ebi-a-GCST90014020 | rs4482463 | A | C | 0.00352406 | -0.0277234 | 2 | 3.64E-15 | 61.888 |  |
| ebi-a-GCST90014020 | rs4525978 | T | C | 0.00211621 | -0.0115435 | 4 | 4.90E-08 | 29.755 |  |
| ebi-a-GCST90014020 | rs4586381 | A | C | 0.00193177 | -0.0107604 | 15 | 2.54E-08 | 31.027 |  |
| ebi-a-GCST90014020 | rs4718964 | T | G | 0.00189052 | 0.0134909 | 7 | 9.60E-13 | 50.924 |  |
| ebi-a-GCST90014020 | rs4722398 | T | C | 0.00270177 | 0.0162822 | 7 | 1.68E-09 | 36.319 |  |
| ebi-a-GCST90014020 | rs4743930 | T | C | 0.00214348 | 0.0120016 | 9 | 2.15E-08 | 31.350 |  |
| ebi-a-GCST90014020 | rs4876611 | G | A | 0.00206202 | 0.0160928 | 8 | 5.98E-15 | 60.908 |  |
| ebi-a-GCST90014020 | rs4900715 | A | G | 0.00185848 | -0.0117012 | 14 | 3.05E-10 | 39.641 |  |
| ebi-a-GCST90014020 | rs4958702 | C | T | 0.00187774 | -0.011939 | 5 | 2.04E-10 | 40.426 |  |
| ebi-a-GCST90014020 | rs4981693 | A | G | 0.00221721 | 0.0166678 | 14 | 5.58E-14 | 56.512 |  |
| ebi-a-GCST90014020 | rs543874 | G | A | 0.00229202 | 0.035504 | 1 | 4.03E-54 | 239.948 |  |
| ebi-a-GCST90014020 | rs55931203 | T | C | 0.0024017 | 0.0242122 | 17 | 6.68E-24 | 101.632 |  |
| ebi-a-GCST90014020 | rs55938344 | C | A | 0.00217834 | -0.0137001 | 12 | 3.19E-10 | 39.555 |  |
| ebi-a-GCST90014020 | rs56187939 | G | A | 0.00201775 | -0.0120003 | 19 | 2.73E-09 | 35.371 |  |
| ebi-a-GCST90014020 | rs56203712 | G | A | 0.00223491 | -0.0153329 | 4 | 6.86E-12 | 47.068 |  |
| ebi-a-GCST90014020 | rs56356382 | C | T | 0.00236186 | -0.0166271 | 19 | 1.92E-12 | 49.559 |  |
| ebi-a-GCST90014020 | rs56398417 | T | C | 0.00200618 | -0.0132917 | 3 | 3.46E-11 | 43.896 |  |
| ebi-a-GCST90014020 | rs57066717 | GAC | G | 0.00207674 | -0.0135636 | 15 | 6.52E-11 | 42.657 |  |
| ebi-a-GCST90014020 | rs57307148 | A | C | 0.00226689 | 0.018511 | 12 | 3.19E-16 | 66.681 |  |
| ebi-a-GCST90014020 | rs57590313 | A | C | 0.00241907 | 0.0146884 | 4 | 1.26E-09 | 36.868 |  |
| ebi-a-GCST90014020 | rs57800857 | C | A | 0.00193887 | -0.0143522 | 4 | 1.34E-13 | 54.795 |  |
| ebi-a-GCST90014020 | rs58449180 | TA | T | 0.00186283 | -0.0108609 | 4 | 5.53E-09 | 33.993 |  |
| ebi-a-GCST90014020 | rs588660 | A | G | 0.00188976 | 0.0148905 | 1 | 3.28E-15 | 62.088 |  |
| ebi-a-GCST90014020 | rs59607297 | C | T | 0.00231141 | 0.0127954 | 8 | 3.10E-08 | 30.645 |  |
| ebi-a-GCST90014020 | rs6030803 | C | T | 0.00281843 | -0.0186385 | 20 | 3.76E-11 | 43.733 |  |
| ebi-a-GCST90014020 | rs60764613 | T | G | 0.002649 | 0.0170996 | 18 | 1.08E-10 | 41.669 |  |
| ebi-a-GCST90014020 | rs60898782 | A | G | 0.00232826 | 0.0150576 | 6 | 9.97E-11 | 41.826 |  |
| ebi-a-GCST90014020 | rs61023343 | C | A | 0.00194062 | 0.0113381 | 5 | 5.14E-09 | 34.135 |  |
| ebi-a-GCST90014020 | rs61813324 | T | C | 0.00275481 | 0.0217781 | 1 | 2.67E-15 | 62.497 |  |
| ebi-a-GCST90014020 | rs61826867 | G | A | 0.00297496 | 0.017592 | 1 | 3.35E-09 | 34.968 |  |
| ebi-a-GCST90014020 | rs61903695 | G | A | 0.00212847 | 0.0125342 | 11 | 3.89E-09 | 34.678 |  |
| ebi-a-GCST90014020 | rs61969510 | C | T | 0.00208168 | 0.0125993 | 13 | 1.43E-09 | 36.632 |  |
| ebi-a-GCST90014020 | rs61992671 | G | A | 0.00193749 | -0.0140485 | 14 | 4.14E-13 | 52.575 |  |
| ebi-a-GCST90014020 | rs62072003 | T | C | 0.00264677 | 0.0146714 | 17 | 2.97E-08 | 30.726 |  |
| ebi-a-GCST90014020 | rs62261725 | G | A | 0.00198409 | -0.0144853 | 3 | 2.86E-13 | 53.301 |  |
| ebi-a-GCST90014020 | rs62395827 | T | C | 0.00308657 | -0.023172 | 6 | 6.03E-14 | 56.360 |  |
| ebi-a-GCST90014020 | rs629471 | G | A | 0.00205531 | 0.0123161 | 16 | 2.07E-09 | 35.908 |  |
| ebi-a-GCST90014020 | rs635132 | G | A | 0.00210813 | 0.0123322 | 18 | 4.92E-09 | 34.220 |  |
| ebi-a-GCST90014020 | rs6416913 | C | T | 0.00208808 | -0.0117898 | 17 | 1.64E-08 | 31.880 |  |
| ebi-a-GCST90014020 | rs6433243 | C | T | 0.00195028 | -0.0132939 | 2 | 9.33E-12 | 46.463 |  |
| ebi-a-GCST90014020 | rs6445258 | C | T | 0.00228807 | -0.0125792 | 3 | 3.85E-08 | 30.225 |  |
| ebi-a-GCST90014020 | rs6567160 | C | T | 0.00219179 | 0.0431506 | 18 | 2.77E-86 | 387.593 |  |
| ebi-a-GCST90014020 | rs6575340 | A | G | 0.0019336 | 0.016753 | 14 | 4.55E-18 | 75.067 |  |
| ebi-a-GCST90014020 | rs6659830 | A | G | 0.00199157 | -0.0176069 | 1 | 9.51E-19 | 78.158 |  |
| ebi-a-GCST90014020 | rs66679256 | T | C | 0.00187143 | 0.0143993 | 4 | 1.42E-14 | 59.202 |  |
| ebi-a-GCST90014020 | rs6695898 | A | G | 0.00186824 | -0.0117009 | 1 | 3.77E-10 | 39.226 |  |
| ebi-a-GCST90014020 | rs6739755 | G | A | 0.00190596 | -0.0155629 | 2 | 3.20E-16 | 66.674 |  |
| ebi-a-GCST90014020 | rs67481408 | TA | T | 0.00209885 | 0.0145727 | 3 | 3.83E-12 | 48.208 |  |
| ebi-a-GCST90014020 | rs6751993 | G | A | 0.00250263 | 0.0428629 | 2 | 9.31E-66 | 293.339 |  |
| ebi-a-GCST90014020 | rs67632512 | A | C | 0.00292281 | 0.0170891 | 5 | 5.01E-09 | 34.185 |  |
| ebi-a-GCST90014020 | rs678278 | G | A | 0.00186352 | -0.0107389 | 6 | 8.28E-09 | 33.209 |  |
| ebi-a-GCST90014020 | rs6845883 | G | A | 0.00225712 | -0.0136018 | 4 | 1.68E-09 | 36.315 |  |
| ebi-a-GCST90014020 | rs7038934 | C | T | 0.00191072 | 0.0111507 | 9 | 5.35E-09 | 34.057 |  |
| ebi-a-GCST90014020 | rs7070670 | T | C | 0.00198865 | -0.0117059 | 10 | 3.95E-09 | 34.649 |  |
| ebi-a-GCST90014020 | rs7115013 | T | C | 0.0018732 | -0.0108313 | 11 | 7.37E-09 | 33.434 |  |
| ebi-a-GCST90014020 | rs7117115 | G | A | 0.00189181 | -0.020044 | 11 | 3.14E-26 | 112.257 |  |
| ebi-a-GCST90014020 | rs7138383 | A | G | 0.0021377 | -0.0158782 | 12 | 1.11E-13 | 55.171 |  |
| ebi-a-GCST90014020 | rs7163176 | A | G | 0.00186898 | -0.011901 | 15 | 1.92E-10 | 40.547 |  |
| ebi-a-GCST90014020 | rs7171864 | A | G | 0.0019695 | 0.0151922 | 15 | 1.22E-14 | 59.502 |  |
| ebi-a-GCST90014020 | rs7179507 | A | G | 0.00199488 | 0.0139805 | 15 | 2.41E-12 | 49.115 |  |
| ebi-a-GCST90014020 | rs7210186 | G | A | 0.00200809 | 0.0121052 | 17 | 1.66E-09 | 36.339 |  |
| ebi-a-GCST90014020 | rs7259070 | C | T | 0.00190994 | 0.0169678 | 19 | 6.45E-19 | 78.924 |  |
| ebi-a-GCST90014020 | rs72892910 | T | G | 0.00247589 | 0.0314001 | 6 | 7.41E-37 | 160.842 |  |
| ebi-a-GCST90014020 | rs72959041 | A | G | 0.00430962 | 0.0301906 | 6 | 2.46E-12 | 49.076 |  |
| ebi-a-GCST90014020 | rs73068448 | T | C | 0.00249665 | -0.01532 | 7 | 8.45E-10 | 37.653 |  |
| ebi-a-GCST90014020 | rs731540 | A | G | 0.00201425 | 0.0126877 | 17 | 3.00E-10 | 39.677 |  |
| ebi-a-GCST90014020 | rs7377083 | A | C | 0.00188796 | 0.01312 | 4 | 3.67E-12 | 48.293 |  |
| ebi-a-GCST90014020 | rs73985439 | C | A | 0.00201968 | 0.0132309 | 2 | 5.72E-11 | 42.915 |  |
| ebi-a-GCST90014020 | rs7498665 | G | A | 0.00189741 | 0.0246546 | 16 | 1.33E-38 | 168.839 |  |
| ebi-a-GCST90014020 | rs7519259 | A | G | 0.00187317 | 0.0134443 | 1 | 7.11E-13 | 51.514 |  |
| ebi-a-GCST90014020 | rs754209 | T | C | 0.00193327 | 0.0111077 | 2 | 9.16E-09 | 33.011 |  |
| ebi-a-GCST90014020 | rs756717 | A | G | 0.00192031 | -0.0115846 | 16 | 1.61E-09 | 36.393 |  |
| ebi-a-GCST90014020 | rs7583157 | G | A | 0.0020597 | 0.0130497 | 2 | 2.36E-10 | 40.141 |  |
| ebi-a-GCST90014020 | rs76040172 | A | G | 0.00409701 | -0.031822 | 21 | 8.03E-15 | 60.328 |  |
| ebi-a-GCST90014020 | rs7630382 | T | C | 0.00186658 | 0.0130901 | 3 | 2.33E-12 | 49.180 |  |
| ebi-a-GCST90014020 | rs76895963 | G | T | 0.00719302 | 0.043494 | 12 | 1.48E-09 | 36.563 |  |
| ebi-a-GCST90014020 | rs7707394 | A | G | 0.00193981 | -0.0181054 | 5 | 1.02E-20 | 87.116 |  |
| ebi-a-GCST90014020 | rs77162980 | C | A | 0.00566212 | -0.0536372 | 18 | 2.72E-21 | 89.738 |  |
| ebi-a-GCST90014020 | rs77165542 | T | C | 0.00508807 | -0.0721526 | 2 | 1.21E-45 | 201.093 |  |
| ebi-a-GCST90014020 | rs77234932 | T | C | 0.00224106 | -0.0165087 | 12 | 1.75E-13 | 54.265 |  |
| ebi-a-GCST90014020 | rs778094 | A | G | 0.00188666 | -0.0114182 | 2 | 1.43E-09 | 36.628 |  |
| ebi-a-GCST90014020 | rs7845090 | A | G | 0.0020578 | -0.0208089 | 8 | 4.88E-24 | 102.257 |  |
| ebi-a-GCST90014020 | rs7894565 | C | T | 0.00201128 | 0.0204287 | 10 | 3.08E-24 | 103.166 |  |
| ebi-a-GCST90014020 | rs7925100 | A | G | 0.00189944 | 0.0124779 | 11 | 5.06E-11 | 43.155 |  |
| ebi-a-GCST90014020 | rs7941828 | T | C | 0.00193243 | -0.0163651 | 11 | 2.48E-17 | 71.718 |  |
| ebi-a-GCST90014020 | rs8078135 | T | C | 0.00186244 | -0.0112572 | 17 | 1.50E-09 | 36.534 |  |
| ebi-a-GCST90014020 | rs815163 | C | T | 0.00187293 | -0.0142686 | 1 | 2.57E-14 | 58.039 |  |
| ebi-a-GCST90014020 | rs869400 | G | T | 0.00240331 | 0.0208153 | 3 | 4.67E-18 | 75.015 |  |
| ebi-a-GCST90014020 | rs883528 | C | T | 0.00203718 | 0.0124716 | 12 | 9.24E-10 | 37.479 |  |
| ebi-a-GCST90014020 | rs894736 | G | A | 0.00193652 | 0.0163291 | 12 | 3.39E-17 | 71.102 |  |
| ebi-a-GCST90014020 | rs927606 | T | C | 0.00185438 | -0.0115761 | 13 | 4.30E-10 | 38.970 |  |
| ebi-a-GCST90014020 | rs9294260 | A | G | 0.00187026 | 0.0128048 | 6 | 7.56E-12 | 46.875 |  |
| ebi-a-GCST90014020 | rs9343 | G | A | 0.00186032 | 0.0103346 | 3 | 2.77E-08 | 30.861 |  |
| ebi-a-GCST90014020 | rs935166 | A | G | 0.00186235 | -0.014013 | 2 | 5.30E-14 | 56.616 |  |
| ebi-a-GCST90014020 | rs9370243 | T | G | 0.00340993 | 0.0199682 | 6 | 4.74E-09 | 34.292 |  |
| ebi-a-GCST90014020 | rs9478496 | C | T | 0.00251312 | 0.0148008 | 6 | 3.88E-09 | 34.685 |  |
| ebi-a-GCST90014020 | rs9536637 | G | T | 0.00292236 | -0.0190168 | 13 | 7.65E-11 | 42.346 |  |
| ebi-a-GCST90014020 | rs9568867 | A | G | 0.00278428 | 0.0215852 | 13 | 9.01E-15 | 60.102 |  |
| ebi-a-GCST90014020 | rs9842991 | A | G | 0.00198363 | 0.0110603 | 3 | 2.46E-08 | 31.089 |  |
| ebi-a-GCST90014020 | rs9843653 | C | T | 0.00186155 | 0.0191257 | 3 | 9.22E-25 | 105.557 |  |
| ebi-a-GCST90014020 | rs9888533 | T | C | 0.0018911 | 0.0108188 | 13 | 1.06E-08 | 32.729 |  |
| ebi-a-GCST90014020 | rs9968060 | T | C | 0.00197793 | 0.0146596 | 3 | 1.25E-13 | 54.932 |  |
| ebi-a-GCST90014020 | rs9991695 | C | A | 0.00186705 | -0.0109181 | 4 | 4.98E-09 | 34.197 |  |
| Group 3 | | | | | | | | | |
| ID | SNP | Effect_allele | Other_allele | Se | Beta | Chr | *P*_val | F | Total F |
| ieu-a-61 | rs10132280 | A | C | 0.0037 | -0.022 | 14 | 2.20E-09 | 35.354 | 48.81320867 |
| ieu-a-61 | rs10767658 | G | C | 0.0037 | -0.031 | 11 | 3.30E-17 | 70.197 |  |
| ieu-a-61 | rs10840100 | G | A | 0.0035 | 0.02 | 11 | 5.40E-09 | 32.653 |  |
| ieu-a-61 | rs10938397 | G | A | 0.0035 | 0.032 | 4 | 6.10E-20 | 83.592 |  |
| ieu-a-61 | rs10968576 | G | A | 0.0036 | 0.025 | 9 | 1.20E-11 | 48.225 |  |
| ieu-a-61 | rs11165623 | A | G | 0.0034 | 0.02 | 1 | 5.20E-09 | 34.602 |  |
| ieu-a-61 | rs12429545 | A | G | 0.0052 | 0.031 | 13 | 2.50E-09 | 35.540 |  |
| ieu-a-61 | rs1516725 | C | T | 0.0051 | 0.031 | 3 | 1.70E-09 | 36.947 |  |
| ieu-a-61 | rs16894959 | C | T | 0.0048 | 0.026 | 6 | 3.40E-08 | 29.340 |  |
| ieu-a-61 | rs16996700 | C | T | 0.0037 | -0.023 | 20 | 1.50E-09 | 38.641 |  |
| ieu-a-61 | rs17381664 | C | T | 0.0035 | 0.022 | 1 | 4.20E-10 | 39.510 |  |
| ieu-a-61 | rs2033529 | G | A | 0.0037 | 0.021 | 6 | 1.70E-08 | 32.213 |  |
| ieu-a-61 | rs2112347 | G | T | 0.0035 | -0.025 | 5 | 3.20E-13 | 51.020 |  |
| ieu-a-61 | rs2287019 | T | C | 0.0046 | -0.035 | 19 | 1.70E-14 | 57.892 |  |
| ieu-a-61 | rs2293576 | A | G | 0.0036 | -0.022 | 11 | 9.40E-10 | 37.346 |  |
| ieu-a-61 | rs2325036 | C | A | 0.0035 | -0.023 | 3 | 2.10E-11 | 43.184 |  |
| ieu-a-61 | rs2489623 | C | A | 0.0034 | 0.019 | 6 | 3.40E-08 | 31.228 |  |
| ieu-a-61 | rs2531992 | G | A | 0.0048 | 0.028 | 16 | 3.00E-09 | 34.028 |  |
| ieu-a-61 | rs2820292 | C | A | 0.0034 | 0.019 | 1 | 2.40E-08 | 31.228 |  |
| ieu-a-61 | rs3127553 | A | G | 0.0035 | -0.023 | 1 | 1.60E-10 | 43.184 |  |
| ieu-a-61 | rs3849570 | A | C | 0.0038 | 0.021 | 3 | 2.20E-08 | 30.540 |  |
| ieu-a-61 | rs4776970 | T | A | 0.0035 | -0.02 | 15 | 2.30E-08 | 32.653 |  |
| ieu-a-61 | rs6163 | A | C | 0.0035 | 0.019 | 10 | 3.70E-08 | 29.469 |  |
| ieu-a-61 | rs6440003 | A | G | 0.0034 | 0.021 | 3 | 2.90E-10 | 38.149 |  |
| ieu-a-61 | rs6545714 | A | G | 0.0035 | -0.022 | 2 | 1.90E-10 | 39.510 |  |
| ieu-a-61 | rs6567160 | C | T | 0.004 | 0.048 | 18 | 2.60E-33 | 144.000 |  |
| ieu-a-61 | rs6755502 | C | T | 0.0045 | 0.051 | 2 | 2.00E-30 | 128.444 |  |
| ieu-a-61 | rs7138803 | A | G | 0.0035 | 0.028 | 12 | 1.60E-15 | 64.000 |  |
| ieu-a-61 | rs7144011 | T | G | 0.0041 | 0.033 | 14 | 9.40E-16 | 64.783 |  |
| ieu-a-61 | rs7239883 | A | G | 0.0035 | -0.021 | 18 | 2.30E-09 | 36.000 |  |
| ieu-a-61 | rs749671 | A | G | 0.0035 | -0.019 | 16 | 3.20E-08 | 29.469 |  |
| ieu-a-61 | rs7498665 | G | A | 0.0035 | 0.034 | 16 | 1.40E-22 | 94.367 |  |
| ieu-a-61 | rs7531118 | C | T | 0.0035 | 0.027 | 1 | 1.50E-14 | 59.510 |  |
| ieu-a-61 | rs7550711 | T | C | 0.0098 | 0.058 | 1 | 3.40E-09 | 35.027 |  |
| ieu-a-61 | rs7903146 | T | C | 0.0037 | -0.022 | 10 | 3.90E-09 | 35.354 |  |
| ieu-a-61 | rs806794 | G | A | 0.0037 | -0.022 | 6 | 2.10E-09 | 35.354 |  |
| ieu-a-61 | rs929641 | G | A | 0.0034 | -0.021 | 2 | 1.20E-09 | 38.149 |  |
| ieu-a-61 | rs9400239 | C | T | 0.0036 | 0.024 | 6 | 1.90E-11 | 44.444 |  |
| ieu-a-61 | rs943005 | T | C | 0.0044 | 0.039 | 6 | 7.20E-19 | 78.564 |  |

eTable 4. Casual effects of MR Analysis between WC and OSA.

| **Group** | **Exposure** | **Outcome** | **method** | **nsnps** | ***P*_value** | **OR** | **OR-low** | **OR-up** | **outliers** | **After removing outliers (re-analysis)** | | | | |
| --- | --- | --- | --- | --- | --- | --- | --- | --- | --- | --- | --- | --- | --- | --- |
| **nsnps** | **p** | **OR** | **OR-low** | **OR-up** |
| *Group 1* | WC  (GWAS ID:  ukb-b-9405) | OSA | MR Egger | 351 | 3.06E-10 | 3.1376022 | 2.2206107 | 4.4332614 | rs13322435, rs56094641, rs7952436, rs1051613 | 347 | 8.22E-07 | 2.6472057 | 1.8104215 | 3.8707551 |
| WM | 351 | 8.36E-18 | 2.0486506 | 1.7395518 | 2.4126727 | 347 | 1.41E-15 | 1.9286446 | 1.6414594 | 2.2660751 |
| IVW | 351 | 2.25E-36 | 2.1917571 | 1.9398067 | 2.4764319 | 347 | 2.37E-34 | 2.1177438 | 1.8776493 | 2.3885391 |
| *Group 2* | WC  (GWAS ID:  ebi-a-GCST90014020) | OSA | MR Egger | 271 | 6.89E-09 | 3.3125864 | 2.2377753 | 4.903633 | rs10938398, rs56094641, rs72820274, rs7952436, rs13322435 | 266 | 2.83E-05 | 2.5444584 | 1.6558661 | 3.9098986 |
| WM | 271 | 1.12E-14 | 1.9918807 | 1.6723605 | 2.3724482 | 266 | 8.85E-11 | 1.8000376 | 1.5070625 | 2.1499675 |
| IVW | 271 | 2.22E-29 | 2.219915 | 1.932041 | 2.5506822 | 266 | 1.12E-26 | 2.0882275 | 1.8245414 | 2.3900219 |
| *Group 3* | WC  (GWAS ID:  ieu-a-61) | OSA | MR Egger | 40 | 0.426045 | 1.4327934 | 0.5966651 | 3.440618 | rs633715 | 39 | 0.1457898 | 1.963169 | 0.8063337 | 4.7796992 |
| Weighted median | 40 | 9.87E-06 | 1.8436933 | 1.4056245 | 2.4182881 | 39 | 7.75E-06 | 1.8448881 | 1.4105765 | 2.4129228 |
| IVW | 40 | 1.68E-08 | 2.0424678 | 1.5937066 | 2.6175926 | 39 | 2.88E-10 | 2.1808058 | 1.7113968 | 2.7789663 |

eTable 5. Results of sensitivity analysis.

| **Group** | **Exposure** | **Outcome** | **MR-Egger Regression** | | | **MR-PRESSO** | | | | **Heterogeneity _IVW** | | **Heterogeneity_MR-Egger** | |
| --- | --- | --- | --- | --- | --- | --- | --- | --- | --- | --- | --- | --- | --- |
| **Egger Intercept** | **SE** | ***P*_value** | **Global P_value** | **Corrected P_value** | **Outliers** | **Distortion P_value** | **Cochran’s Q** | ***P*_value** | **Cochran’s Q** | ***P*_value** |
| Group 1 | WC  (GWAS ID: ukb-b-9405) | OSA | -0.00355 | 0.003 | 0.22575 | <0.001 | <0.001 | rs13322435, rs56094641, rs7952436, rs1051613 | 0.595 | 513.6635 | 1.51E-08 | 511.4802 | 1.36E-08 |
| Group 2 | WC  (GWAS ID: ebi-a-GCST90014020) | OSA | -0.00325 | 0.003 | 0.3431488 | <0.001 | <0.001 | rs10938398, rs56094641, rs72820274, rs7952436, rs13322435 | 0.286 | 411.038 | 2.14E-08 | 409.6386 | 2.20E-08 |
| Group 3 | WC  (GWAS ID: ieu-a-61) | OSA | 0.00289 | 0.012 | 0.8109422 | <0.001 | <0.001 | rs633715 | 0.618 | 84.68849 | 2.07E-05 | 84.55584 | 1.38E-05 |

eTable 6. Results of MRlap analysis.

| **Exposure** | **Outome** | **Corrected_effect** | **Corrected_effect_*p*** | **Difference_*p*** |
| --- | --- | --- | --- | --- |
| WC (Group 1) | OSA | 0.22 | 1.21E-24 | 2.86E-18 |
| WC (Group 2 ) | 0.57 | 1.05E-03 | 1.46E-05 |
| WC (Group 3) | 0.32 | 1.60E-12 | 1.72E-08 |

| **Exposure** | **Adjustment** | **Outome** | **OR(95% CI)** | ***P*** |
| --- | --- | --- | --- | --- |
| WC (Group 1) | Smoking  Alcohol drinking | OSA | 2.27 (1.98-2.61) | 1.05E-31 |
| WC (Group 2 ) | 2.22 (1.90-2.60) | 9.70E-24 |
| WC (Group 3) | 1.96 (1.54-2.49) | 3.17E-08 |

eTable 7. Multivariate MR results.
